# Supplementary material for: Deep learning detects cardiotoxicity in a high-content screen with induced pluripotent stem cell-derived cardiomyocytes
Source: eLife. 2021 Aug 2;10:e68714. doi: 10.7554/eLife.68714 (PMC8367386; doi:10.7554/eLife.68714)
Supplement: Figure 5—figure supplement 1—source data 1. [file elife-68714-fig5-figsupp1-data1.xlsx]

## Sheet: Hits - 2Class 3 Doses (A)
	DMSO	0.3μM	1.0μM	3.0μM
WZ8040	0.0295833	0.5422	0.3961	0.2764
Zileuton	0.0295833	0.3551	0.1707	0.3692
Mosapride	0.0295833	0.6406	0.4695	0.4113
Roscovitine	0.0295833	0.9947	0.877	0.9007
Streptozotocin	0.0295833	0.4428	0.2518	0.183
Adrucil	0.0295833	0.3465	0.2577	0.1719
Betamethasone	0.0295833	0.9999	0.9975	0.9798
Meropenem	0.0295833	0.362	0.2034	0.1316
Regorafenib	0.0295833	0.5782	0.3777	0.3912
Lamivudine	0.0295833	0.9708	0.9155	0.9958
Chlorpromazine	0.0295833	0.9985	0.9404	0.9986
Imidapril	0.0295833	0.4506	0.536	0.4731
Rasagiline	0.0295833	0.9995	1	1
Anagrelide	0.0295833	0.0984	0.3131	0.3401
CI-1040	0.0295833	0.0147	0.1541	0.8395
Dimesna	0.0295833	0.0748	0.08	0.3675
Sotalol	0.0295833	0.003	0.2894	0.1723
Melatonin	0.0295833	0.0656	0.26	0.1745
Solifenacin	0.0295833	0.0016	0.7604	0.9953
BI 2536	0.0295833	0.0003	0.0152	0.9698
Daunorubicin	0.0295833	0.0078	0.0029	0.388
Nitrendipine	0.0295833	0.0108	0.0007	0.0324
PHA-767491	0.0295833	0.0124	0.1277	0.0573
Rosiglitazone	0.0295833	0.0384	0.1057	0.0573
AG-1478	0.0295833	0.0443	0.0512	0.1949
Bortezomib	0.0295833	0.999525	1	0.997175
Doxorubicin	0.0295833	0.18655	0.96095	0.986525

## Sheet: Hits - 3Class 3 Doses (A)
	DMSO	0.3μM	1.0μM	3.0μM
WZ8040	0.208055	0.9065	0.7674	0.7375
Zileuton	0.208055	0.8649	0.6946	0.9807
Mosapride	0.208055	0.9657	0.7732	0.7554
Roscovitine	0.208055	1.8846	1.3788	1.4623
Streptozotocin	0.208055	0.7095	0.5566	0.541
Adrucil	0.208055	0.6357	0.6328	0.7596
Betamethasone	0.208055	1.9429	1.6521	1.8134
Meropenem	0.208055	0.6182	0.6004	0.7646
Regorafenib	0.208055	0.8126	0.8199	0.9529
Lamivudine	0.208055	1.8928	1.5652	1.9853
Chlorpromazine	0.208055	1.9632	1.7075	1.9804
Imidapril	0.208055	0.8217	0.9223	0.9206
Rasagiline	0.208055	1.9407	1.99	1.9515
Anagrelide	0.208055	0.3214	0.5877	0.7505
CI-1040	0.208055	0.1519	0.6798	1.415
Dimesna	0.208055	0.4129	0.6083	0.9462
Sotalol	0.208055	0.2837	0.711	0.6856
Melatonin	0.208055	0.2191	0.5463	0.5159
Solifenacin	0.208055	0.1428	1.2424	1.8263
BI 2536	0.208055	0.3023	0.4863	1.797
Daunorubicin	0.208055	0.1696	0.3425	0.8931
Nitrendipine	0.208055	0.2364	0.2566	0.6001
PHA-767491	0.208055	0.1058	0.2265	0.5045
Rosiglitazone	0.208055	0.4285	0.3537	0.5046
AG-1478	0.208055	0.2413	0.4165	0.8084
Bortezomib	0.208055	1.99	1.99507	1.95558
Doxorubicin	0.208055	0.791875	1.8093	1.93338

## Sheet: Hits - 4Class 3 Doses (A)
	DMSO	0.3μM	1.0μM	3.0μM
WZ8040	0.163932	0.9742	0.634	0.826
Zileuton	0.163932	0.8353	0.5041	1.1375
Mosapride	0.163932	1.5174	0.8884	1.127
Roscovitine	0.163932	2.8437	2.2762	2.5188
Streptozotocin	0.163932	0.7505	0.4678	0.5325
Adrucil	0.163932	0.7951	0.5885	0.797
Betamethasone	0.163932	2.9332	2.7249	2.83
Meropenem	0.163932	0.8096	0.5783	0.7955
Regorafenib	0.163932	1.2442	1.0813	1.0003
Lamivudine	0.163932	1.8514	1.6942	1.9895
Chlorpromazine	0.163932	1.9911	1.7396	1.9697
Imidapril	0.163932	1.0467	1.1073	1.3011
Rasagiline	0.163932	2.9446	2.9421	2.9487
Anagrelide	0.163932	0.3395	0.5626	0.8815
CI-1040	0.163932	0.1569	0.708	1.6498
Dimesna	0.163932	0.4781	0.5979	1.0375
Sotalol	0.163932	0.1622	0.8648	0.828
Melatonin	0.163932	0.1852	0.6602	0.6732
Solifenacin	0.163932	0.0742	1.3524	2.3504
BI 2536	0.163932	0.2687	0.3311	2.4128
Daunorubicin	0.163932	0.0925	0.1988	1.3918
Nitrendipine	0.163932	0.2038	0.1467	0.5474
PHA-767491	0.163932	0.0918	0.1393	0.4447
Rosiglitazone	0.163932	0.2671	0.2955	0.4343
AG-1478	0.163932	0.1173	0.2948	0.9202
Bortezomib	0.163932	2.7165	2.94988	2.91913
Doxorubicin	0.163932	0.888125	2.56675	2.77065

## Sheet: Hits - MYBPC3 Intensity 3 Doses
	DMSO	0.3μM	1.0μM	3.0μM
WZ8040	100	97.2633	107.191	89.6863
Zileuton	100	63.6168	76.6552	48.0882
Mosapride	100	84.6819	92.9408	81.0853
Roscovitine	100	7.37171	13.6512	-0.22568
Streptozotocin	100	93.4382	90.8886	84.9595
Adrucil	100	83.5814	84.7951	76.9962
Betamethasone	100	2.77723	1.53324	1.06343
Meropenem	100	81.8291	93.9985	81.7506
Regorafenib	100	54.4598	85.5137	89.8734
Lamivudine	100	92.8238	96.3666	91.9992
Chlorpromazine	100	100.047	92.7616	93.2056
Imidapril	100	91.3414	96.2418	112.491
Rasagiline	100	55.5333	41.1686	42.9974
Anagrelide	100	97.8777	100.604	102.148
CI-1040	100	106.474	61.6515	81.6882
Dimesna	100	83.9554	86.0253	84.8833
Sotalol	100	70.6001	74.5669	89.1212
Melatonin	100	82.7897	85.7251	84.8796
Solifenacin	100	99.903	86.4912	51.9263
BI 2536	100	98.428	106.094	66.0179
Daunorubicin	100	87.5773	124.734	78.1458
Nitrendipine	100	99.8303	118.589	110.963
PHA-767491	100	100.343	146.252	86.8333
Rosiglitazone	100	89.5131	90.1208	87.9547
AG-1478	100	89.5393	119.982	86.1889
Bortezomib	100	47.9689	39.8223	20.7196
Doxorubicin	100	56.7322	37.8269	41.9376

## Sheet: Hits - ACTN2 Intensity 3 Doses 
	DMSO	0.3μM	1.0μM	3.0μM
WZ8040	100	100.471	109.249	96.5074
Zileuton	100	75.5729	86.1499	62.6223
Mosapride	100	85.992	96.8247	81.6638
Roscovitine	100	8.56921	13.9647	1.37879
Streptozotocin	100	94.5545	91.1653	90.6203
Adrucil	100	87.4052	95.4079	92.3814
Betamethasone	100	1.09434	0.986789	0.429944
Meropenem	100	87.6754	101.34	94.8326
Regorafenib	100	55.7253	88.847	94.1353
Lamivudine	100	81.9956	80.6923	80.6752
Chlorpromazine	100	76.5414	76.3538	80.0312
Imidapril	100	97.7935	98.6851	104.587
Rasagiline	100	54.2286	31.2575	35.758
Anagrelide	100	96.7228	106.302	101.194
CI-1040	100	108.084	77.4071	109.209
Dimesna	100	92.5524	89.2637	87.0909
Sotalol	100	93.1847	81.1265	97.513
Melatonin	100	90.9803	87.8329	94.526
Solifenacin	100	96.3771	88.1271	71.7762
BI 2536	100	106.532	108.499	48.9359
Daunorubicin	100	86.2759	105.68	72.84
Nitrendipine	100	101.47	113.466	102.253
PHA-767491	100	104.57	120.579	114.821
Rosiglitazone	100	94.3973	94.1721	92.095
AG-1478	100	95.138	110.965	93.8876
Bortezomib	100	66.2261	59.6165	31.7876
Doxorubicin	100	71.2132	55.7633	59.164

## Sheet: Hits - Nuclear Count Doses
	DMSO	0.3μM	1.0μM	3.0μM
WZ8040	3750	2700	2835	2780
Zileuton	3750	2605	2335	1930
Mosapride	3750	2840	2877.5	2382.5
Roscovitine	3750	172.5	355	22.5
Streptozotocin	3750	2910	2820	2915
Adrucil	3750	2705	2707.5	2870
Betamethasone	3750	60	35	50
Meropenem	3750	2402.5	2785	3315
Regorafenib	3750	1055	2085	2977.5
Lamivudine	3750	4212.5	4335	3600
Chlorpromazine	3750	4415	4385	4125
Imidapril	3750	3187.5	3087.5	3317.5
Rasagiline	3750	1577.5	972.5	1012.5
Anagrelide	3750	2922.5	2050	2767.5
CI-1040	3750	3240	1450	2540
Dimesna	3750	2457.5	2275	2817.5
Sotalol	3750	4205	1670	2725
Melatonin	3750	3030	3280	2242.5
Solifenacin	3750	3467.5	3035	1870
BI 2536	3750	3477.5	3417.5	1607.5
Daunorubicin	3750	3112.5	3495	3852.5
Nitrendipine	3750	3395	2642.5	2792.5
PHA-767491	3750	4100	3950	3342.5
Rosiglitazone	3750	3032.5	2017.5	3142.5
AG-1478	3750	3907.5	3682.5	3470
Bortezomib	3750	1805	1409.69	583.125
Doxorubicin	3750	1856.56	1343.44	1657.19
