# Supplementary material for: Deep learning detects cardiotoxicity in a high-content screen with induced pluripotent stem cell-derived cardiomyocytes
Source: eLife. 2021 Aug 2;10:e68714. doi: 10.7554/eLife.68714 (PMC8367386; doi:10.7554/eLife.68714)
Supplement: Figure 6—source data 1. [file elife-68714-fig6-data1.xlsx]

## Sheet: Deep Learning Validation(A)
	DMSO	0.3μM	1.0μM	3.0μM
WZ8040	0.0597625	0.286071	0.359557	1.03449
Daunorubicin	0.0597625	1.21571	1.79079	1.82327
BI 2536	0.0597625	0.873243	0.531314	1.47364
Nitrendipine	0.0597625	1.96665	1.80192	1.97033
PHA-767491	0.0597625	0.603329	0.776671	0.667157
Solifenacin	0.0597625	0.316057	0.841914	1.07084
Tegaserod	0.0597625	0.6165	0.6446	1.27662

## Sheet: Basal Respiration(C)
	DMSO	0.3μM	1.0μM	3.0μM
WZ8040	124.28	90.73	54.38	51.31
Daunorubicin	124.28	63.62	62.78	35.71
BI 2536	124.28	60.44	60.57	51.37
Nitrendipine	124.28	74.98	60.84	25.13
PHA-767491	124.28	109.6	104.78	85.68
Solifenacin	124.28	94.92	63.31	61.27
Tegaserod	124.28	112.52	83.05	55.52

## Sheet: Max Respiration(C)
	DMSO	0.3μM	1.0μM	3.0μM
WZ8040	658.09	493.52	442.87	459.18
Daunorubicin	658.09	403.27	182.02	78.41
BI 2536	658.09	424.85	355.06	381.8
Nitrendipine	658.09	373.32	385.83	337.25
PHA-767491	658.09	627.08	671.6	443.2
Solifenacin	658.09	546.74	460.25	450.54
Tegaserod	658.09	568.01	610.69	455.5

## Sheet: ATP Production(C)
	DMSO	0.3μM	1.0μM	3.0μM
WZ8040	123.45	89.13	59.35	58.94
Daunorubicin	123.45	69.2	58.35	49.59
BI 2536	123.45	55.66	55.2	48.1
Nitrendipine	123.45	74.37	66.8	24.63
PHA-767491	123.45	103.63	101.5	84.58
Solifenacin	123.45	98.61	64.15	50.96
Tegaserod	123.45	110.35	86.8	48.06

## Sheet: Spare Respiratory Capacity(C)
	DMSO	0.3μM	1.0μM	3.0μM
WZ8040	533.81	402.79	388.48	407.87
Daunorubicin	533.81	339.66	119.24	79.32
BI 2536	533.81	364.41	294.49	330.42
Nitrendipine	533.81	298.33	324.99	312.13
PHA-767491	533.81	517.49	566.81	357.53
Solifenacin	533.81	451.82	396.93	389.27
Tegaserod	533.81	455.48	527.64	399.97

## Sheet: BNP Validation(E)
	DMSO	0.3μM	1.0μM	3.0μM
WZ8040	1	0.963899	0.498195	0.241877
Daunorubicin	1	0.471558	0.323166	0.342951
BI 2536	1	1.26354	1.09386	0.823105
Nitrendipine	1	0.30742	0.374558	0.293286
PHA-767491	1	2.20141	2.30389	2.68905
Solifenacin	1	0.812274	0.588448	0.472924
Tegaserod	1	1.00443	0.961417	0.470588

## Sheet: OCR Data(B)
Time (minutes)	DMSO	DMSO	DMSO	DMSO	DMSO	DMSO	WZ8040 (3 μM)	WZ8040 (3 μM)	WZ8040 (3 μM)	WZ8040 (3 μM)	WZ8040 1uM	WZ8040 1uM	WZ8040 1uM	WZ8040 1uM	WZ8040 0.3uM	WZ8040 0.3uM	WZ8040 0.3uM	WZ8040 0.3uM	Daunorubicin 3uM	Daunorubicin 3uM	Daunorubicin 3uM	Daunorubicin 3uM	Daunorubicin 1uM	Daunorubicin 1uM	Daunorubicin 1uM	Daunorubicin 1uM	Daunorubicin 0.3uM	Daunorubicin 0.3uM	Daunorubicin 0.3uM	Daunorubicin 0.3uM	PHA-767491 3uM	PHA-767491 3uM	PHA-767491 3uM	PHA-767491 3uM	PHA-767491 1uM	PHA-767491 1uM	PHA-767491 1uM	PHA-767491 1uM	PHA-767491 0.3uM	PHA-767491 0.3uM	PHA-767491 0.3uM	PHA-767491 0.3uM	BI-2535 3uM	BI-2535 3uM	BI-2535 3uM	BI-2535 3uM	BI-2535 1uM	BI-2535 1uM	BI-2535 1uM
1.30899	164.017	153.456	155.097	181.268	137.972	145.604	80.2422	90.106	79.4759	86.9796	101.707	131.513	128.826	107.712	137.747	157.042	139.261	134.216	25.3065	9.21051	23.4788	34.2832	63.7635	51.3161	33.4634	18.9263	103.5	106.263	85.0196	73.8217	122.386	97.4712	70.6662	115.435	153.727	157.51	153.789	161.512	169.065	166.91	152.821	149.35	100.143	82.917	62.2954	66.8344	81.5618	112.405	67.8681
7.76619	156.148	148.52	147.732	167.289	131.172	137.56	74.1095	82.2311	71.8913	79.8556	94.4969	117.494	118.264	100.088	127.967	140.888	125.787	122.508	24.9683	9.20391	22.3287	31.3283	63.3642	49.8102	32.0719	18.0183	98.3749	93.8826	71.41	69.2534	116.789	89.4644	64.3733	101.887	145.58	150.55	142.013	142.701	162.307	149.846	142.274	149.428	91.8669	75.138	53.8808	63.5264	74.3108	104.587	66.9632
14.2164	163.981	147.339	147.132	167.035	135.092	136.538	81.0154	79.771	70.873	78.7477	85.4642	105.291	115.696	97.3312	128.552	133.824	123.845	123.134	26.338	12.1397	23.283	38.9058	63.5111	49.8933	33.4335	20.0598	94.3769	96.7129	74.1382	68.27	121.708	92.1741	66.3644	99.0897	143.749	149.735	137.712	139.055	157.938	155	145.452	148.749	92.6289	78.7046	53.8658	63.8728	79.2319	104.751	60.4373
20.769	60.2886	66.5071	65.4272	71.2506	69.4691	62.9827	41.4199	62.0007	40.0051	44.1456	49.8889	57.2043	56.359	53.9714	61.0815	64.7904	59.4875	60.9894	18.1471	12.3861	21.2851	29.6586	30.9176	27.4698	18.5495	13.9546	45.3337	44.4677	38.3174	41.4399	52.1643	43.5533	38.6655	47.7233	70.1017	69.4292	67.4188	63.3815	66.3616	76.1141	72.7015	74.2281	51.9997	45.8575	35.1051	39.3453	49.8925	50.1599	39.1535
27.2322	66.3874	66.5458	64.6908	71.8548	66.8239	60.2152	41.4996	35.6263	40.9392	43.5496	46.9232	60.853	56.4776	52.9714	59.8076	62.8265	58.7348	57.916	17.3846	10.7284	17.3949	29.6692	29.804	29.2033	19.4739	13.5027	45.7057	42.6909	34.8021	42.6377	55.2815	44.217	37.6905	46.3331	74.1654	70.3903	71.4309	64.6464	69.3981	77.2564	71.3156	74.435	47.8299	44.2617	34.154	40.2896	47.6964	48.497	36.1706
33.7013	63.4266	61.9212	59.8434	69.0749	63.1115	56.7333	35.9798	37.5668	37.5208	39.4911	42.0486	59.0364	51.1789	47.0909	54.1539	58.0909	54.1322	51.5031	15.4424	7.9799	14.4192	25.1533	24.5133	22.6414	16.1071	9.45552	41.1879	40.7469	31.8431	37.8606	49.6915	39.9744	32.663	40.7128	65.9469	66.8425	66.0065	60.0312	63.7273	75.1551	68.5639	70.9116	43.9743	40.4849	29.7438	35.1995	43.8707	44.5872	32.0595
40.252	547.142	583.881	517.631	565.686	511.636	492.038	385.376	327.29	368.788	341.371	424.276	421.756	471.905	350.388	477.041	470.148	484.892	391.275	47.0802	13.3587	33.2182	38.4233	148.703	96.3435	70.9181	43.3832	345.144	302.005	282.302	289.242	463.276	350.012	184.029	285.394	577.046	640.329	580.57	508.83	662.168	477.308	567.242	543.56	375.883	299.811	245.673	313.37	261.646	395.367	219.346
46.7212	489.757	539.698	476.521	501.767	490.856	463.64	385.267	287.102	339.705	315.072	437.741	381.475	439.857	341.341	444.213	440.156	471.831	363.142	46.0479	13.2887	34.3243	39.5248	149.298	86.8194	67.0084	39.893	307.265	271.351	274.398	268.113	428.272	330.489	171.873	262.494	522.754	545.414	553.296	501.422	589.636	466.321	531.652	541.628	331.811	283.019	227.466	280.141	245.574	374.599	216.414
53.1901	460.196	476.614	458.706	420.449	459.558	440.4	384.412	283.956	335.297	311.932	450.582	381.648	440.425	349.545	433.958	436.923	479.357	363.556	45.9474	13.7173	34.1578	38.2073	148.448	86.4851	65.7035	39.3236	298.707	264.163	277.101	265.354	421.59	331.31	169.24	261.448	504.649	477.66	520.198	477.231	502.35	455.956	486.224	525.618	325.608	279.737	224.779	263.268	248.253	374.267	217.555
59.7411	65.2071	65.3139		66.7089	60.8453	52.3771	45.0435	47.5434	43.0023	47.9811	53.2949	64.0685	56.1768	60.3596	55.9277	56.069	52.4813	47.1322	16.2972	11.4568	17.3547	27.5882	24.5158	22.0066	15.5151	11.7146	46.9503	46.1357	38.2248	42.3325	48.0587	49.6813	22.6474	40.7928	70.3232	59.7177	58.7272	58.7019	65.7361	70.3272	64.2452	72.2496	46.3336	30.0119	29.2132	34.1074	34.7872	46.5254	23.6325
66.2113	67.5915	68.7284		70.1721	68.8308	60.559	42.0899	45.2939	42.0572	45.0452	49.0909	61.8212	56.8773	52.8072	56.4195	59.6961	57.5468	50.9845	15.9002	11.2187	17.7911	27.6131	21.1066	19.6586	14.0813	10.2734	46.7302	45.114	34.9672	41.2835	50.2403	46.6078	26.3538	41.0742	67.4851	63.2131	61.7304	63.4523	64.5654	65.7908	60.646	68.5517	44.8192	33.8536	30.3165	35.4339	39.2311	47.9376	26.5794
72.6883	67.0786	69.0399		70.2197	69.6355	62.4747	40.6298	44.3598	41.5825	44.9082	47.1682	60.7742	56.2106	51.6583	56.0471	59.3395	58.936	52.1319	15.378	11.0754	17.48	28.4487	20.5887	20.5373	14.5061	10.4554	46.4254	44.4168	34.7606	40.6305	50.5238	45.9048	27.7211	40.6907	64.9727	62.8739	62.2791	62.9559	63.8846	65.107	61.5529	68.6025	44.7938	36.0497	31.9232	36.4682	43.8497	47.1585	29.3689
[truncated: 43 more columns]
