# Supplementary material for: Deep learning detects cardiotoxicity in a high-content screen with induced pluripotent stem cell-derived cardiomyocytes
Source: eLife. 2021 Aug 2;10:e68714. doi: 10.7554/eLife.68714 (PMC8367386; doi:10.7554/eLife.68714)
Supplement: Figure 8—source data 1. [file elife-68714-fig8-data1.xlsx]

## Sheet: Diversity Screen at 1.0 uM
Compound Library	DMSO (0.1%)	Bortezomib (0.1 μM)	Doxorubicin (1.0 μM)
1.4094
1.3533
1.3371
1.2326
1.216
1.1755
0.9937
0.8651
0.8639
0.8448
0.8303
0.8051
0.7986
0.7457
0.7452
0.7411
0.7346
0.7204
0.7106
0.7043
0.6925
0.6892
0.6705
0.6584
0.654
0.6395
0.6348
0.6179
0.6142
0.6115
0.5952
0.5828
0.5783
0.5776
0.5769
0.5735
0.5699
0.5692
0.5683
0.5671
0.5625
0.5612
0.5541
0.5495
0.5462
0.5396
0.5386
0.5381
0.5358
0.5335
0.5321
0.53
0.5296
0.5284
0.5271
0.5223
0.5222
0.5189
0.5166
0.513
0.5128
0.5103
0.5095
0.5094
0.5071
0.5055
0.4996
0.4977
0.4967
0.4964
0.4949
0.4866
0.4839
0.4829
0.4756
0.4752
0.4749
0.4736
0.473
0.4722
0.4716
0.4711
0.4692
0.469
0.4672
0.4625
0.4579
0.4576
0.456
0.4552
0.4548
0.4541
0.4539
0.452
0.4518
0.4491
0.4484
0.4471
0.4443
0.4441
0.4439
0.4438
0.4434
0.443
0.4415
0.4369
0.4364
0.4326
0.4315
0.4301
0.4294
0.4278
0.4273
0.4251
0.424
0.423
0.4228
0.4194
0.4187
0.4178
0.4155
0.4154
0.4146
0.4117
0.4113
0.4102
0.4076
0.4054
0.4054
0.4049
0.4046
0.4043
0.4026
0.398
0.3967
0.3959
0.3929
0.3904
0.3901
0.3884
0.3829
0.3816
0.3811
0.3811
0.3777
0.3776
0.3772
0.3746
0.3743
0.3729
0.3727
0.3712
0.3711
0.3693
0.3689
0.3687
0.3683
0.368
0.3676
0.3671
0.366
0.366
0.3655
0.3641
0.3623
0.362
0.3618
0.3617
0.3617
0.3608
0.36
0.3572
0.3565
0.3563
0.3561
0.3548
0.354
0.3537
0.3518
0.3502
0.3488
0.348
0.3477
0.3472
0.3471
0.3462
0.3454
0.3449
0.3438
0.3417
0.3417
0.3402
0.34
0.3398
0.3394
0.339
0.3384
0.3383
0.3368
0.3367
0.336
0.3359
0.3352
0.3352
0.3336
0.3327
0.332
0.3313
0.3305
0.3296
0.3296
0.3294
0.3291
0.3288
0.3286
0.3285
0.3285
0.3273
0.3271
0.3267
0.3261
0.3253
0.3241
0.3238
0.3236
0.3233
0.3228
0.3221
0.322
0.3215
0.3205
0.3201
0.3193
0.3183
0.3177
0.3176
0.3167
0.3166
0.3157
0.3153
0.315
0.3134
0.3129
0.3123
0.3113
0.3101
0.31
0.3099
0.3094
0.3093
0.3092
0.3087
0.3087
0.3087
0.3086
0.3079
0.3078
0.3076
0.3074
0.3067
0.3064
0.3054
0.3053
0.3049
0.3029
0.3029
0.3006
0.3006
0.3005
0.2999
0.2997
0.2994
0.2993
0.2992
0.2983
0.2975
0.2974
0.297
0.2959
0.295
0.2948
0.2937
0.2935
0.2934
0.2933
0.2933
0.2931
0.2923
0.2923
0.2909
0.29
0.2897
0.2892
0.2889
0.2884
0.2884
0.2882
0.2877
0.2868
0.2867
0.2865
0.2863
0.2863
0.2862
0.2855
0.2843
0.2841
0.284
0.284
0.284
0.2833
0.2826
0.2823
0.282
0.2817
0.2812
0.2812
0.2811
0.2793
0.2782
0.2779
0.2779
0.2779
0.2776
0.2773
0.2772
0.2762
0.2758
0.2754
0.2754
0.2752
0.2749
0.2748
0.2744
0.2744
0.2737
0.2733
0.2733
0.2729
0.2723
0.2721
0.2719
0.2719
0.2717
0.2717
0.2714
0.2708
0.2706
0.2704
0.2704
0.2696
0.269
0.2686
0.2682
0.2662
0.2661
0.2661
0.2657
0.2656
0.2652
0.2651
0.2637
0.2634
0.2631
0.2622
0.2622
0.262
0.2612
0.2605
0.2605
0.2603
0.2602
0.2593
0.2593
0.2591
0.2591
0.259
0.2588
0.2587
0.2579
0.2577
0.2573
0.2571
0.257
0.2564
0.2561
0.256
0.2556
0.2553
0.2551
0.2551
0.255
0.255
0.2548
0.2547
0.2545
0.2545
0.2543
0.2541
0.2533
0.2532
0.2527
0.2524
0.2519
0.2517
0.2514
0.251
0.2507
0.2495
0.2488
0.2485
0.2471
0.2469
0.2463
0.2459
0.2455
0.2453
0.2452
0.2449
0.2447
0.2443
0.2441
0.2437
0.2435
0.2434
0.2429
0.2427
0.2425
0.2424
0.2422
0.2421
0.2421
0.2417
0.2408
0.2407
0.2401
0.24
0.2397
0.2391
0.2391
0.238
0.2375
0.2373
0.2366
0.2363
0.2359
0.2354
0.2344
0.2336
0.233
0.2327
0.2323
0.2322
0.232
0.2308
0.2307
0.2304
0.2303
0.2302
0.2302
0.229
0.2289
0.2287
0.2284
0.2278
0.2274
0.2269
0.2269
0.2267
0.2265
0.2258
0.2256
0.2256
0.2255
0.2244
0.2243
0.2241
0.2239
0.2238
0.2236
0.2235
0.2234
0.2231
0.2224
0.2221
0.2212
0.2209
0.2208
0.2207
0.22
0.2198
0.2194
0.2193
0.2187
0.2178
0.2172
0.2171
0.217
0.2164
0.2163
0.2156
0.2152
0.2152
0.2148
0.2146
0.214
0.2138
0.2136
0.2135
0.2131
0.2131
0.2128
0.2127
0.2127
0.2126
0.2125
0.2121
0.2121
0.2114
0.2112
0.2112
0.211
0.2108
0.2108
0.2105
0.2103
0.2101
0.21
0.2097
0.2095
0.2093
0.2093
0.2092
0.2082
0.2079
0.2078
0.2076
0.2076
0.2074
0.2067
0.2066
0.2065
0.2061
0.2059
0.2057
0.2053
0.2053
0.2049
0.2049
0.2046
0.2045
0.2037
0.2037
0.2033
0.2031
0.2024
0.2021
0.202
0.202
0.2018
0.2014
0.2013
0.2009
0.2007
0.2007
0.2005
0.2004
0.2004
0.2003
0.2002
0.2001
0.1998
0.1996
0.199
0.1988
0.1987
0.1984
0.1982
0.1981
0.1981
0.1979
0.1979
0.1979
0.1977
0.1977
0.197
0.1966
0.1966
0.1963
0.1963
0.1962
0.196
0.1959
0.1954
0.1954
0.1954
0.195
0.1949
0.1946
0.1944
0.1943
0.1941
0.194
0.1939
0.1936
0.1933
0.193
0.1929
0.1929
0.1928
0.1924
0.1919
0.1918
0.1917
0.1916
0.1915
0.1914
0.1914
0.191
0.1908
0.1906
0.1905
0.1904
0.19
0.19
0.1898
0.1898
0.1897
0.1895
0.1892
0.1886
0.1884
0.1883
0.1883
0.1881
0.1881
0.1881
0.1879
0.1877
0.1877
0.1877
0.1876
0.1875
0.1875
0.187
0.1865
0.1861
0.186
0.1852
0.1842
0.1838
0.1834
0.1828
0.1827
0.1826
0.1825
0.1823
0.182
0.1814
0.1814
0.1812
0.1806
0.1799
0.1798
0.1797
0.1796
0.1795
0.1794
0.1792
0.1789
0.1789
0.1788
0.1785
0.1784
0.1781
0.1779
0.1777
0.1772
0.1772
0.1759
0.1754
0.1753
0.1751
0.1749
0.1742
0.1741
0.1739
0.1737
0.1736
0.1735
0.1733
0.173
0.1729
0.1727
0.1727
0.1724
0.1723
0.1721
0.1716
0.1716
0.1714
0.1714
0.1713
0.1707
0.1706
0.1706
0.1702
0.17
0.1695
0.1691
0.1691
0.1689
0.1686
0.1684
0.1684
0.1684
0.1684
0.1682
0.1682
0.1681
0.168
0.1673
0.1673
0.1672
0.1671
0.167
0.1667
0.1664
0.1663
0.1661
0.1654
0.1654
0.1653
0.1651
0.1649
0.1647
0.1639
0.1638
0.1636
0.1633
0.1629
0.1626
0.1625
0.162
0.1619
0.1615
0.1614
0.1608
0.1607
0.1605
0.16
0.1599
0.1598
0.1596
0.1584
0.1581
0.158
0.1579
0.1578
0.1577
0.157
0.1566
0.1565
0.1563
0.1562
0.1562
0.1559
0.1555
0.1554
0.155
0.1549
0.1548
0.1548
0.1543
0.1543
0.1541
0.154
0.1538
0.1538
0.1535
0.1533
0.153
0.153
0.1523
0.152
0.1517
0.1517
0.1514
0.1513
0.1512
0.151
0.1507
0.1506
0.1502
0.15
0.1499
0.1499
0.1497
0.1495
0.1495
0.1491
0.1489
0.1488
0.1486
0.1485
0.1484
0.1481
0.1479
0.1479
0.1478
0.1478
0.1476
0.1473
0.147
0.1465
0.1465
0.1465
0.1462
0.1458
0.1457
0.1456
0.1456
0.1452
0.1447
0.1446
0.1445
0.1441
0.144
0.144
0.1433
0.1433
0.1431
0.1429
0.1426
0.1419
0.1417
0.1415
0.1413
0.1411
0.141
0.141
0.1408
0.1406
0.1405
0.1398
0.1395
0.1394
0.1393
0.1393
0.1388
0.1388
0.1387
0.1386
0.1385
0.1375
0.1373
0.1373
0.137
0.1368
0.1365
0.1363
0.1362
0.1361
0.1357
0.1356
0.1349
0.1348
0.1348
0.1341
0.1341
0.1339
0.1338
0.1337
0.1335
0.1334
0.1329
0.1329
0.1326
0.1323
0.1312
0.1311
0.131
0.1307
0.1303
0.1302
0.13
0.1297
0.1297
0.1296
0.1294
0.1292
0.1289
0.1286
0.1285
0.1283
0.1279
0.1278
0.1272
0.1269
0.1267
0.1267
0.1265
0.1262
0.1259
0.1259
0.1258
0.1258
0.1257
0.1256
0.1255
0.1254
0.1249
0.1248
0.1244
0.1242
0.1242
0.1241
0.1235
0.1234
0.1234
0.1232
0.1231
0.1228
0.1227
0.122
0.1216
0.1213
0.121
0.1201
0.1201
0.1201
0.1201
0.12
0.1199
0.1198
0.1197
0.1196
0.1196
0.1196
0.1195
0.1194
0.1193
0.1192
0.1191
0.1187
0.1187
0.118
0.1179
0.1174
0.1173
0.1171
0.1167
0.1165
0.1162
0.1161
0.1159
0.1157
0.1156
0.1156
0.1155
0.115
0.1147
0.1143
0.114
0.1134
0.1132
0.113
0.113
0.1129
0.1128
0.1127
0.1121
0.112
0.1108
0.1107
0.1106
0.1105
0.1104
0.1098
0.1096
0.1096
0.1094
0.1094
0.1094
0.1093
0.1084
0.1082
0.1081
0.1079
0.1079
0.1075
0.1073
0.1073
0.1072
0.107
0.1069
0.1067
0.1062
0.106
0.106
0.1056
0.1054
0.1054
0.1053
0.1051
0.1048
0.1047
0.1042
0.1041
0.1039
0.1039
0.1036
0.1035
0.1028
0.1025
0.1024
0.1021
0.102
0.1018
0.1017
0.1015
0.1015
0.1013
0.1009
0.1008
0.1008
0.1
0.0999
0.0995
0.0995
0.0995
0.099
0.0988
0.0984
0.0983
0.0983
0.098
0.0977
0.0976
0.0976
0.0974
0.0974
0.0973
0.0973
0.0971
0.097
0.0968
0.0968
0.0967
0.0967
0.0962
0.0962
0.096
0.0955
0.0955
0.0952
0.0952
0.0951
0.0939
0.0936
0.0936
0.0932
0.0931
0.0931
0.0928
0.0926
0.0921
0.0917
0.0915
0.0915
0.0914
0.0914
0.091
0.0896
0.0892
0.0891
0.0884
0.0881
0.0877
0.0876
0.0876
0.0875
0.0873
0.0873
0.0869
0.0868
0.0867
0.0864
0.0858
0.0856
0.0856
0.0854
0.0853
0.0852
0.0851
0.085
0.0848
0.0847
0.0842
0.0841
0.084
0.0838
0.0832
0.0826
0.082
0.0818
0.0818
0.0818
0.0813
0.0812
0.0812
0.081
0.081
0.0809
0.0803
0.0802
0.0798
0.0796
0.0793
0.0793
0.079
0.0787
0.0786
0.0785
0.0783
0.0779
0.0778
0.0772
0.0768
0.0766
0.0762
0.0758
0.0753
0.0749
0.0746
0.0744
0.0738
0.0738
0.0729
0.0729
0.0729
0.0728
0.0728
0.0726
0.0723
0.0718
0.0718
0.0717
0.0716
0.0715
0.0714
0.0711
0.0709
0.0707
0.0704
0.0702
0.07
0.0699
0.0697
0.0697
0.0695
0.0694
0.0684
0.068
0.068
0.068
0.0676
0.0675
0.0675
0.0672
0.0669
0.0665
0.0662
0.0661
0.066
0.0659
0.0658
0.0657
0.0656
0.0654
0.0645
0.064
0.0636
0.0629
0.0625
0.0622
0.0619
0.0619
0.0617
0.0616
0.0614
0.0614
0.0611
0.0608
0.0608
0.0604
0.0596
0.0594
0.0588
0.0587
0.0583
0.0582
0.0577
0.0573
0.0573
0.0572
0.0569
0.0567
0.0567
0.0565
0.0565
0.0561
0.0559
0.0558
0.0558
0.0557
0.0556
0.0555
0.0554
0.0545
0.0544
0.0544
0.0535
0.053
0.0529
0.0523
0.0518
0.0516
0.0515
0.0514
0.0508
0.0508
0.0508
0.0502
0.0498
0.0497
0.0496
0.0494
0.0476
0.0469
0.0464
0.0459
0.0443
0.0441
0.0439
0.0437
0.0432
0.0431
0.0421
0.042
0.041
0.0409
0.0395
0.039
0.0383
0.037
0.0368
0.0365
0.0351
0.0344
0.0343
0.0338
0.0333
0.0313
0.0308
0.0306
0.0305
0.0293
0.029
0.0281
0.0275
0.0264
0.0264
0.0247
0.0237
0.0231
0.0223
0.0162
0.0147
0.0112
	0.1543
	0.1312
	0.0957
	0.0787
	0.1469
	0.1327
	0.1085
	0.1631
	0.1405
	0.0873
	0.153
	0.0585
	0.2012
	0.1881
	0.1664
	0.0543
	0.0965
	0.0876
	0.0496
	0.1384
	0.0308
	0.0704
	0.2769
	0.1335
	0.0378
	0.385
	0.1103
	0.1138
	0.0892
	0.22
	0.3733
	0.0115
	0.2761
	0.5184
	0.144
	0.3308
	0.292
	0.3755
	0.6113
	0.172
	0.4085
	0.4222
	0.1727
	0.1196
	0.2886
	0.0847
	0.3139
	0.1568
	0.2844
	0.1752
	0.2559
	0.1663
	0.1859
	0.1498
	0.2422
	0.2732
	0.1459
	0.2832
	0.188
	0.2028
	0.2013
	0.3463
		1.889
		1.9392
		1.9437
		1.9028
		1.7914
		1.8394
		1.8221
		1.8496
		1.7679
		1.6772
		1.6729
		1.6004
		1.6363
		1.6336
		1.5726
		1.6344
		1.7985
		1.8765
		1.7879
		1.6765
		1.7941
		1.7196
		1.697
		1.1508
		1.7441
		1.6814
		1.6626
		1.5916
		1.6321
		1.6894
		1.6442
		1.6034
			1.9184
			1.9503
			1.9476
			1.9112
			1.9253
			1.9448
			1.9237
			1.913
			1.8235
			1.8418
			1.8013
			1.8315
			1.7923
			1.926
			1.9242
			1.8847
			1.7737
			1.7056
			1.8238
			1.6994
			1.8223
			1.8219
			1.8202
			1.8645
			1.856
			1.0718
			1.8574
			1.7808
			1.812
			1.8637
			1.8923
			1.9196

## Sheet: IC50 vs CM Score - 2D Plot
	IC50	CM
Delanzomib	12.33	0.132
Carfilzomib	12.45	1.871
Bortezomib	15.04	1.5552
Ixazomib	24.98	0.7762
Oprozomib	25.47	0.537
Epoxomicin	26.72	1.6018
MG-132	260.9	0.5524
Celastrol	5000	0.81
PI-1840	5000	0.6684
VR23	5000	0.615
