# Supplementary material for: Deep learning detects cardiotoxicity in a high-content screen with induced pluripotent stem cell-derived cardiomyocytes
Source: eLife journal article supplement (doi:10.7554/elife.68714), 2021-08-02

**Deep Learning**

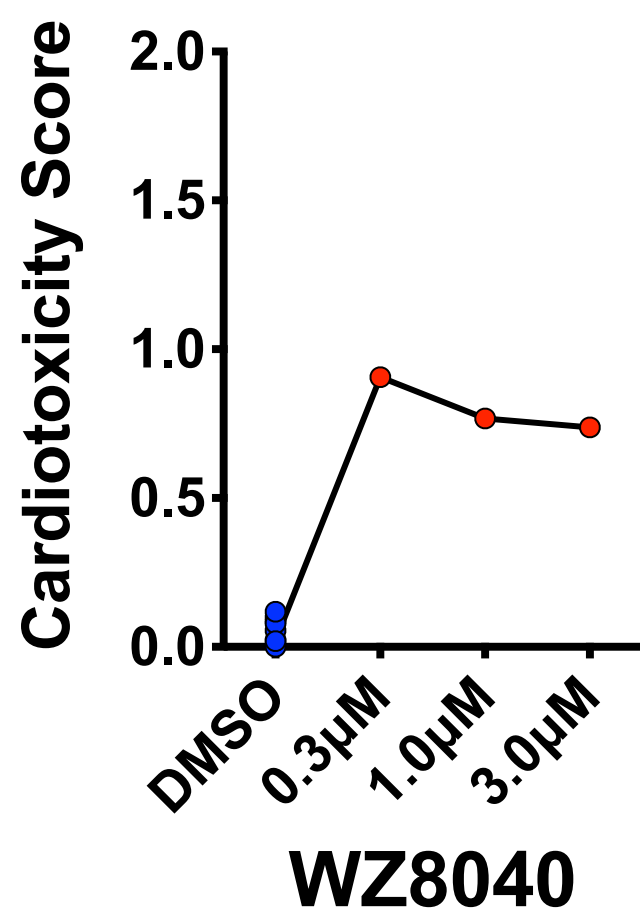

**Immunostaining**

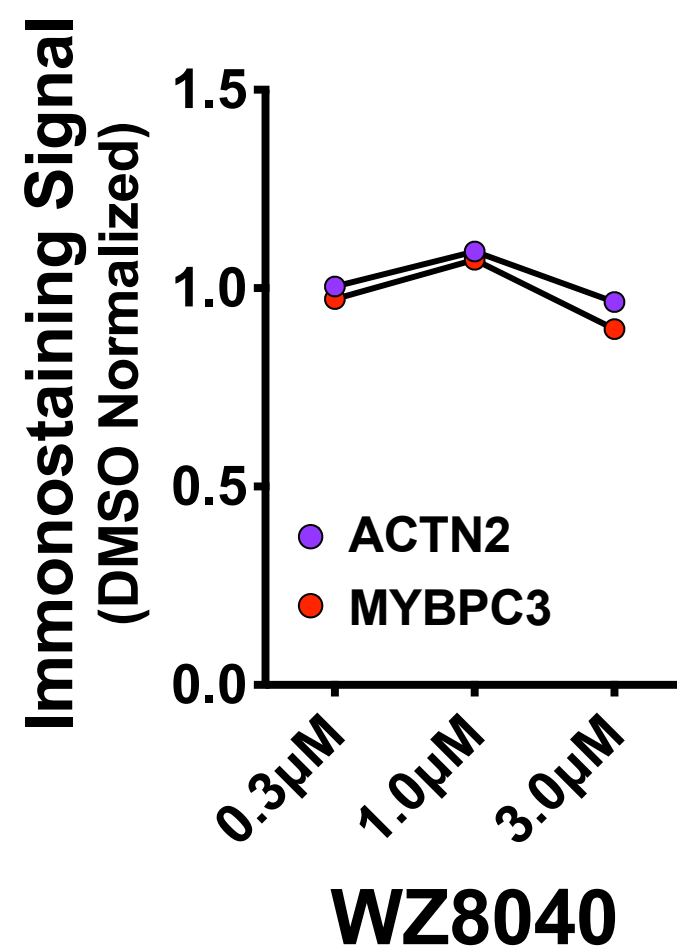

**Deep Learning**

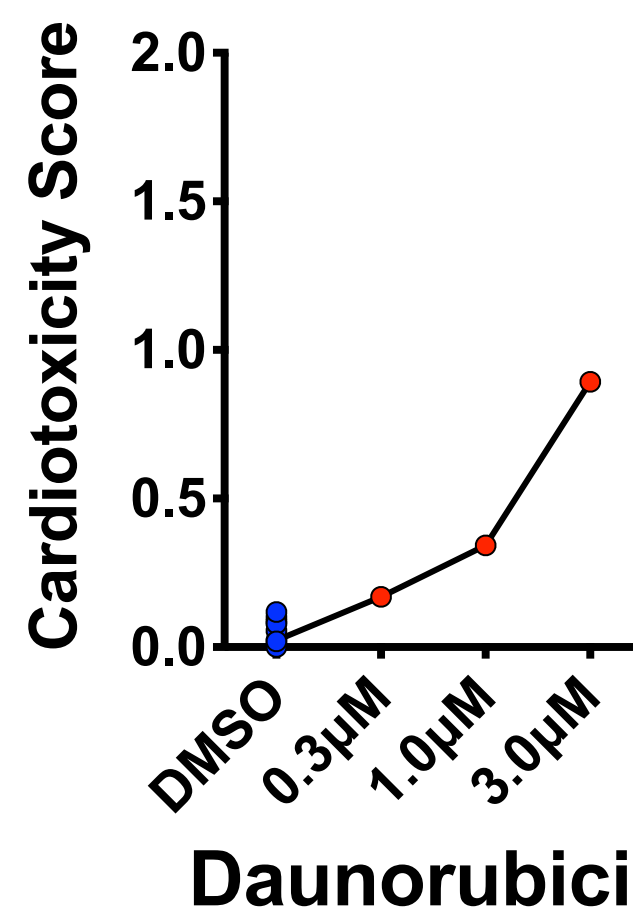

**Immunostaining**

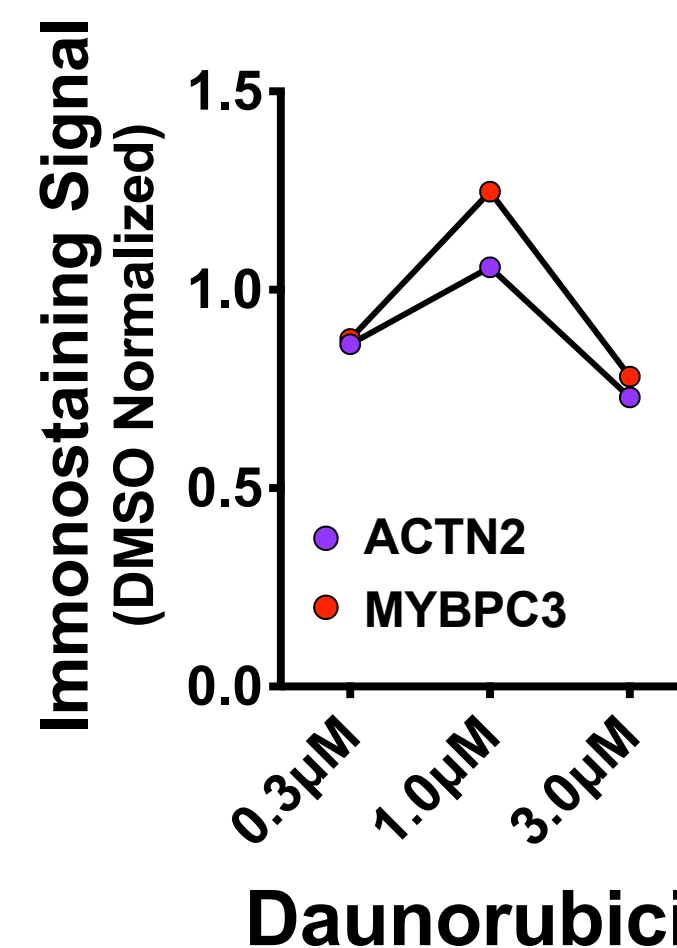

**Deep Learning**

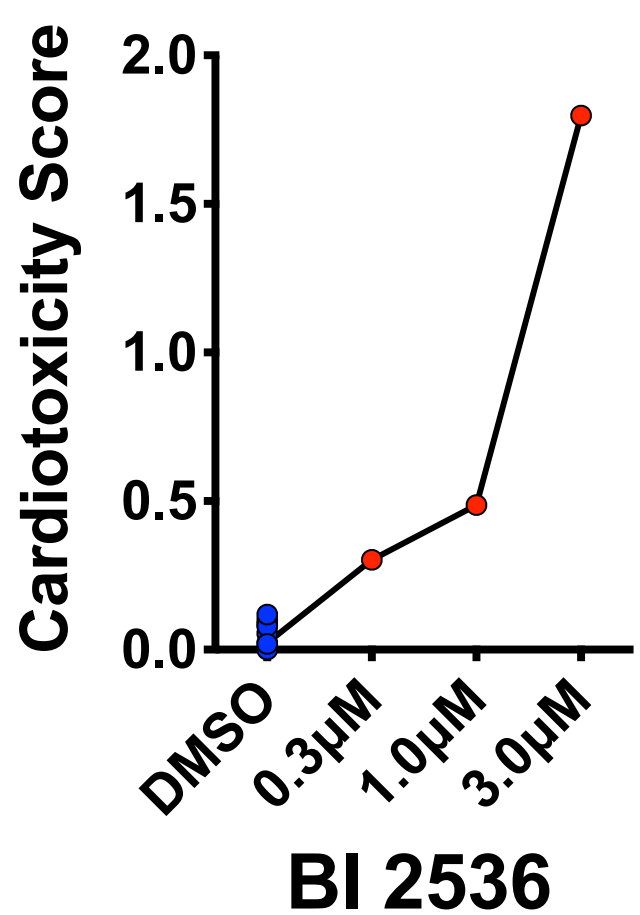

**Immunostaining**

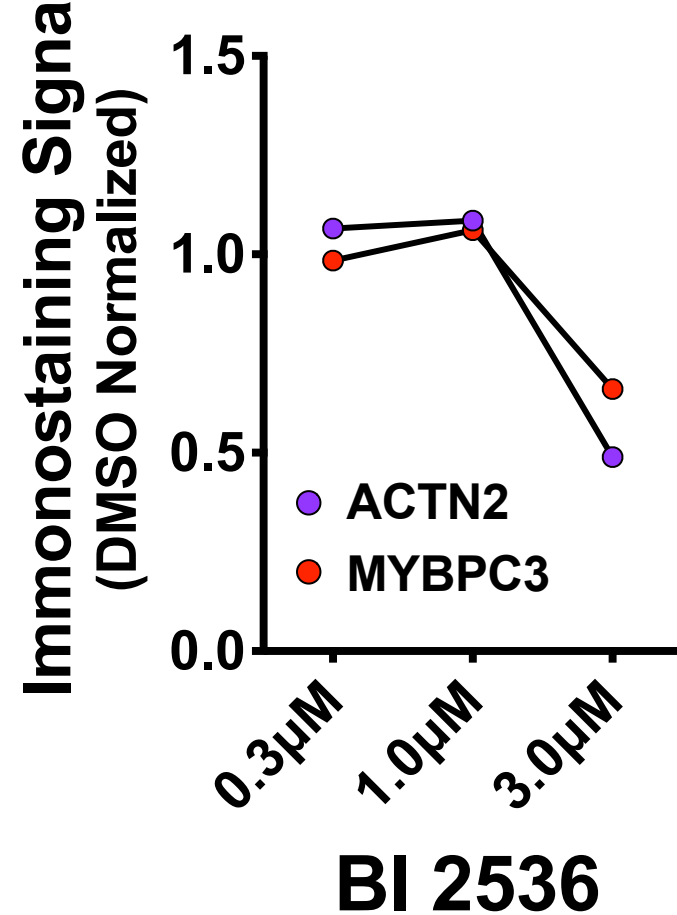

**Deep Learning**

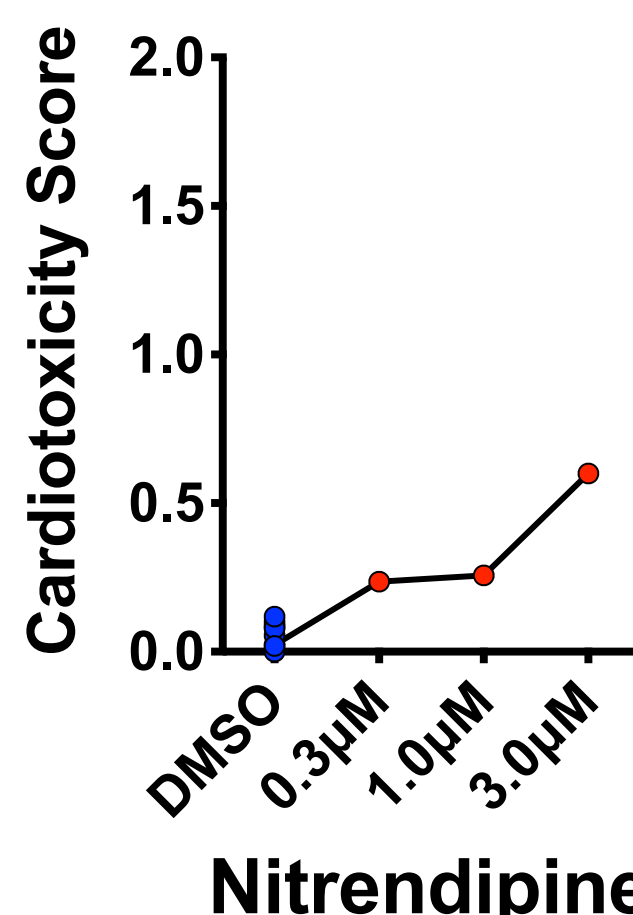

**Immunostaining**

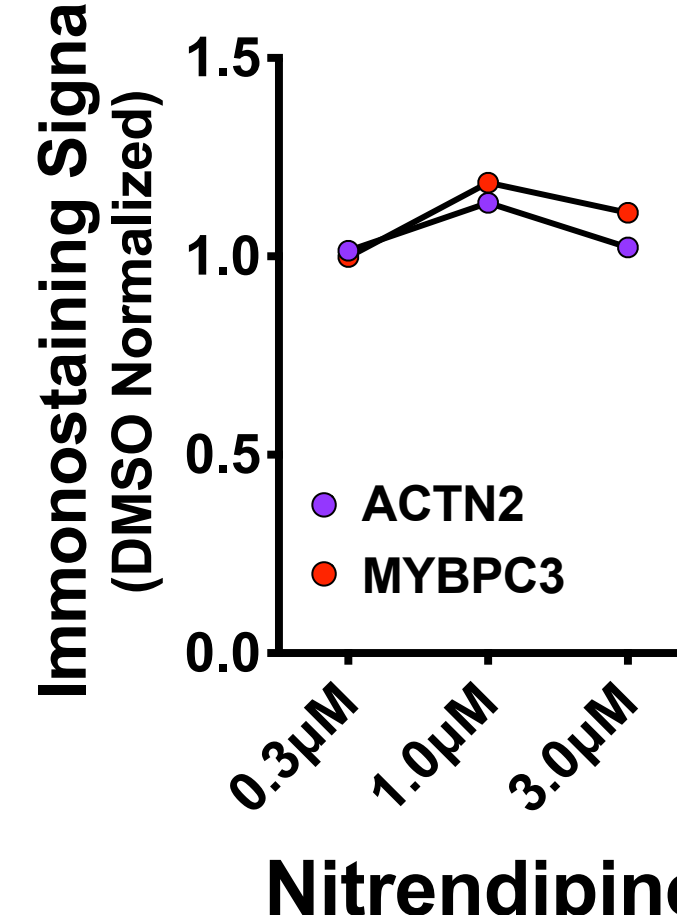

**Deep Learning**

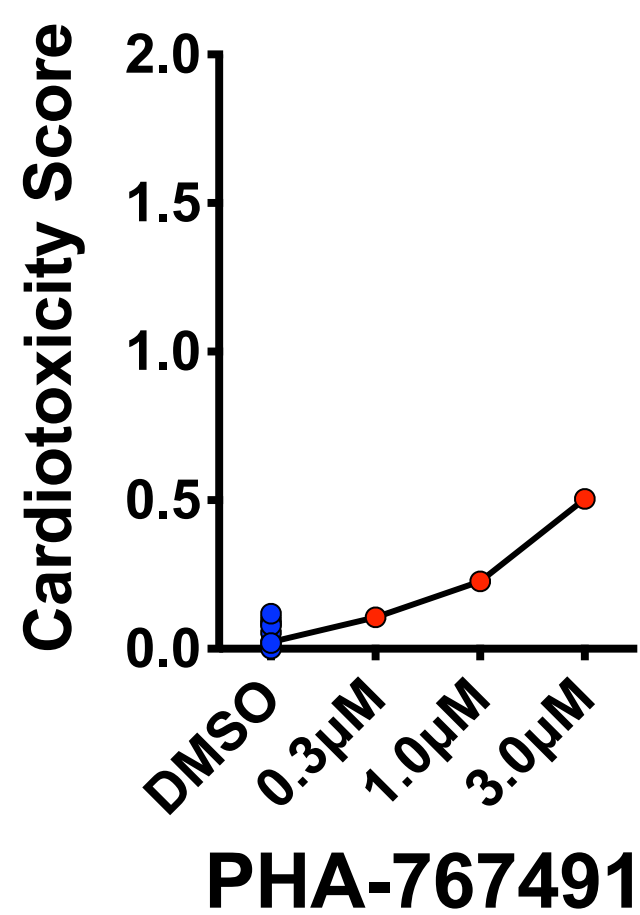

**Immunostaining**

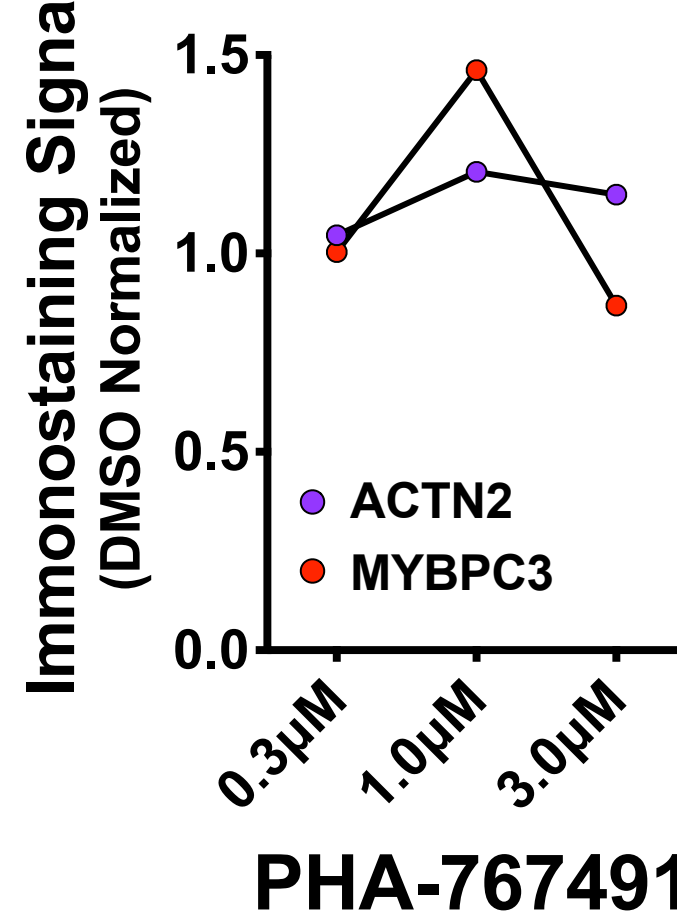

**Deep Learning**

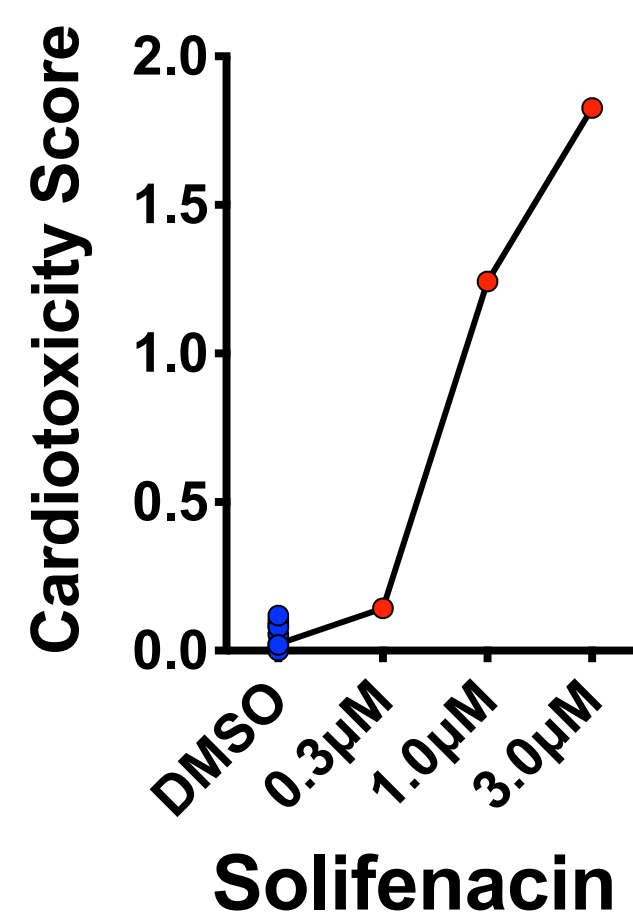

**Immunostaining**

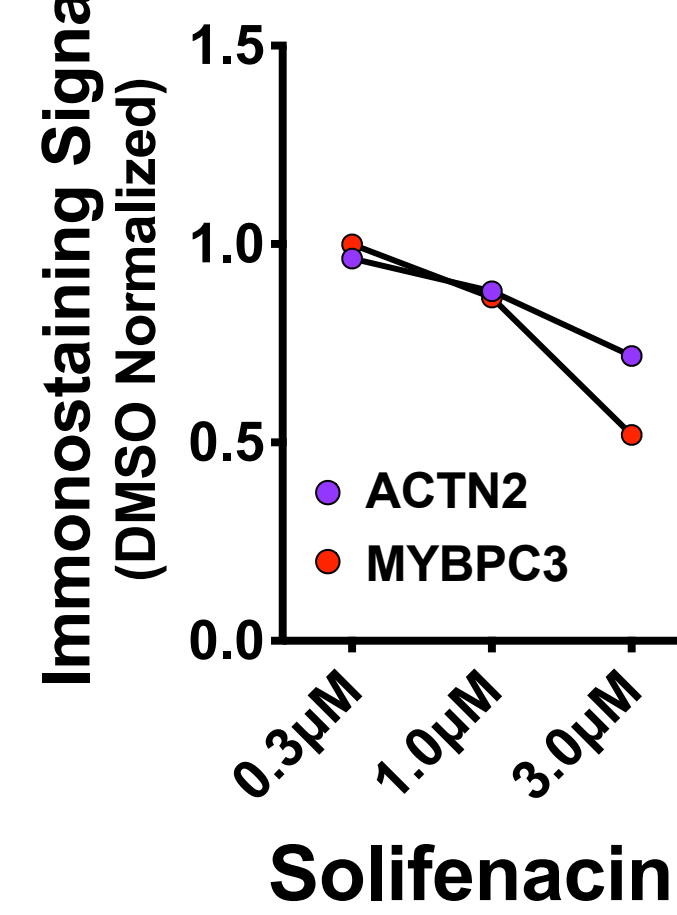

Supplement: supp [file elife-68714-supp-v1.zip]
