# Supplementary figures and images for: Deep learning detects cardiotoxicity in a high-content screen with induced pluripotent stem cell-derived cardiomyocytes
Source: eLife journal article supplement (doi:10.7554/elife.68714), 2021-08-02

A

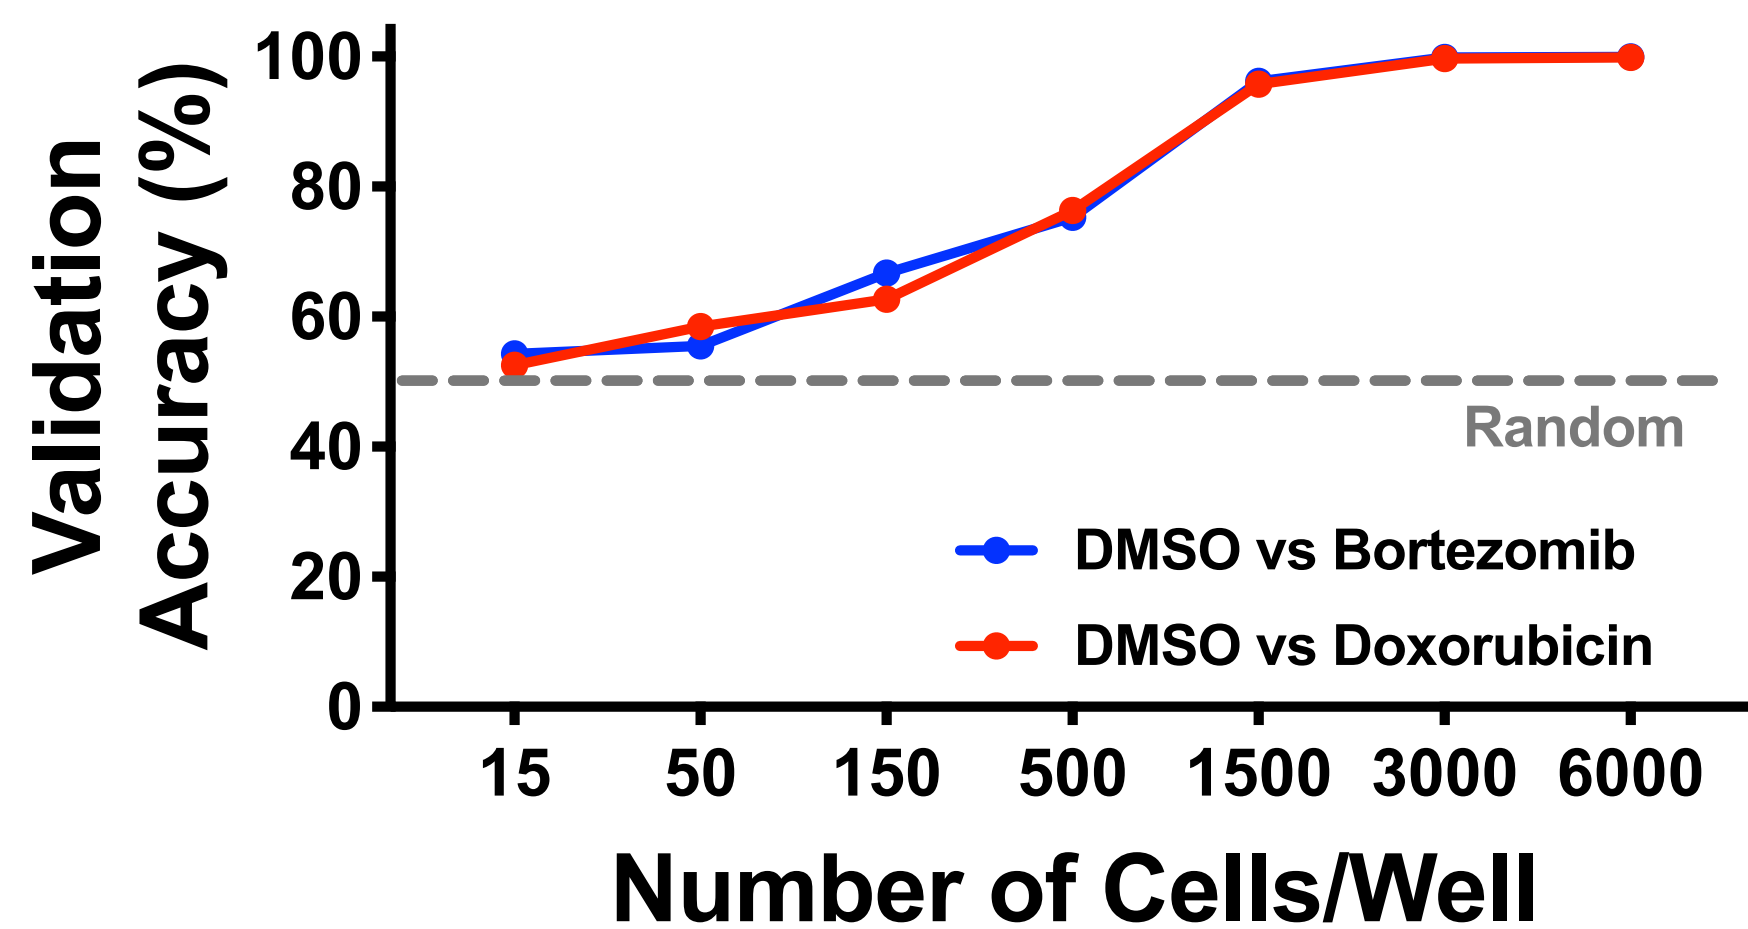

B

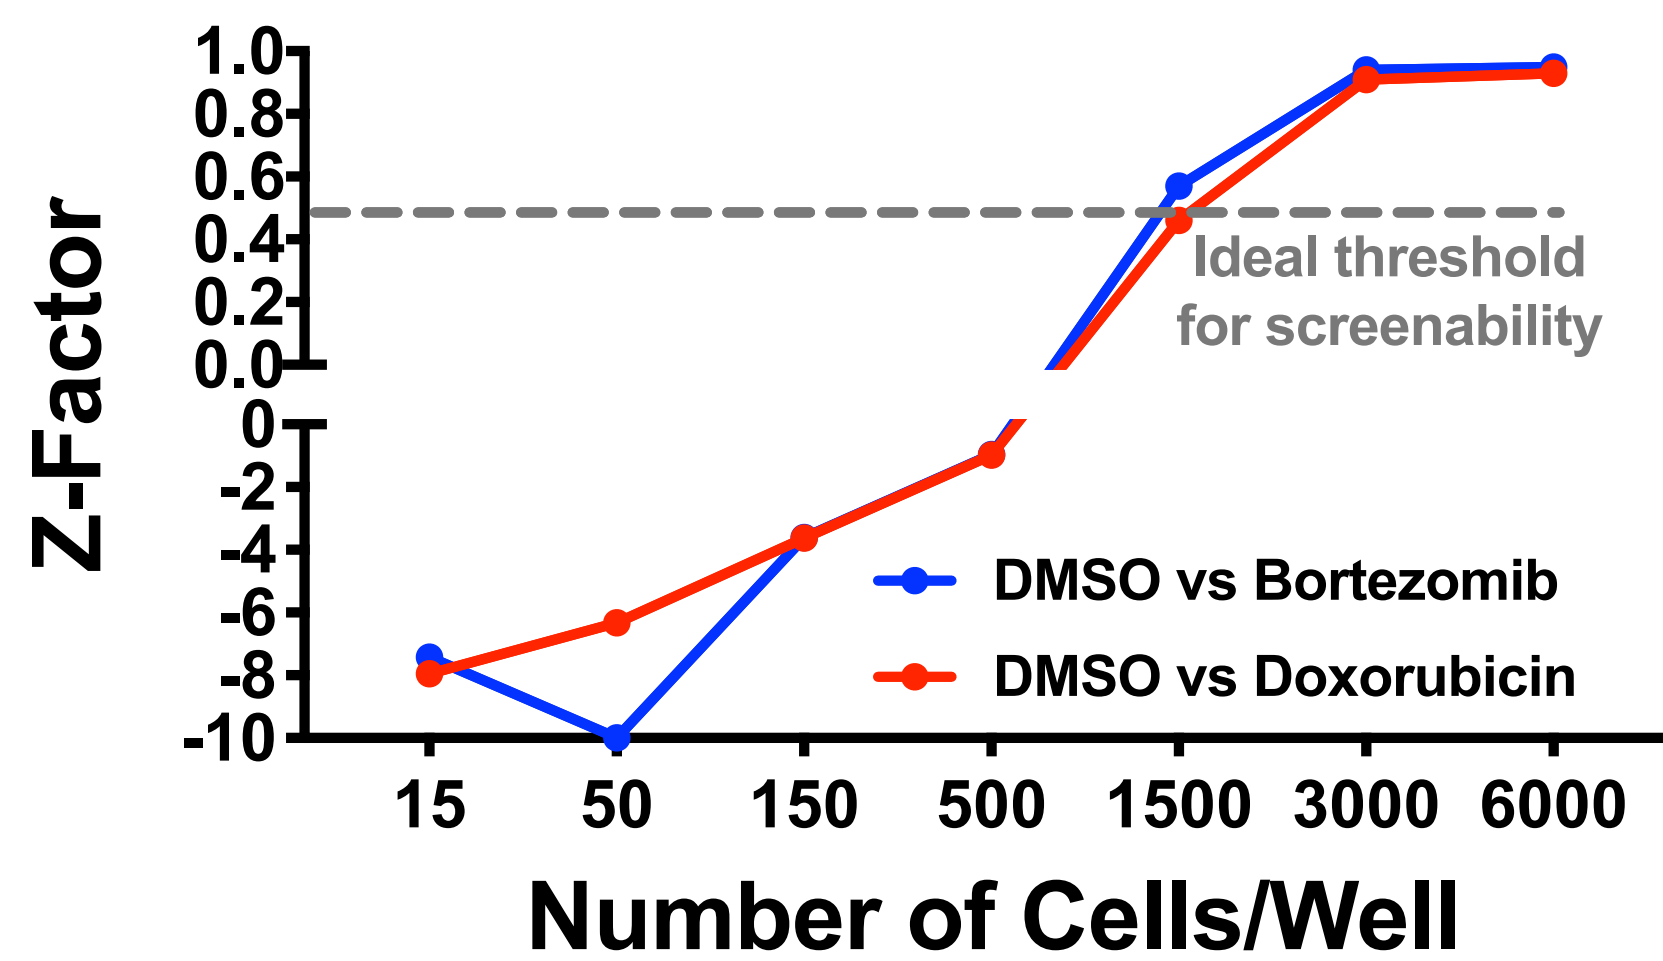

C

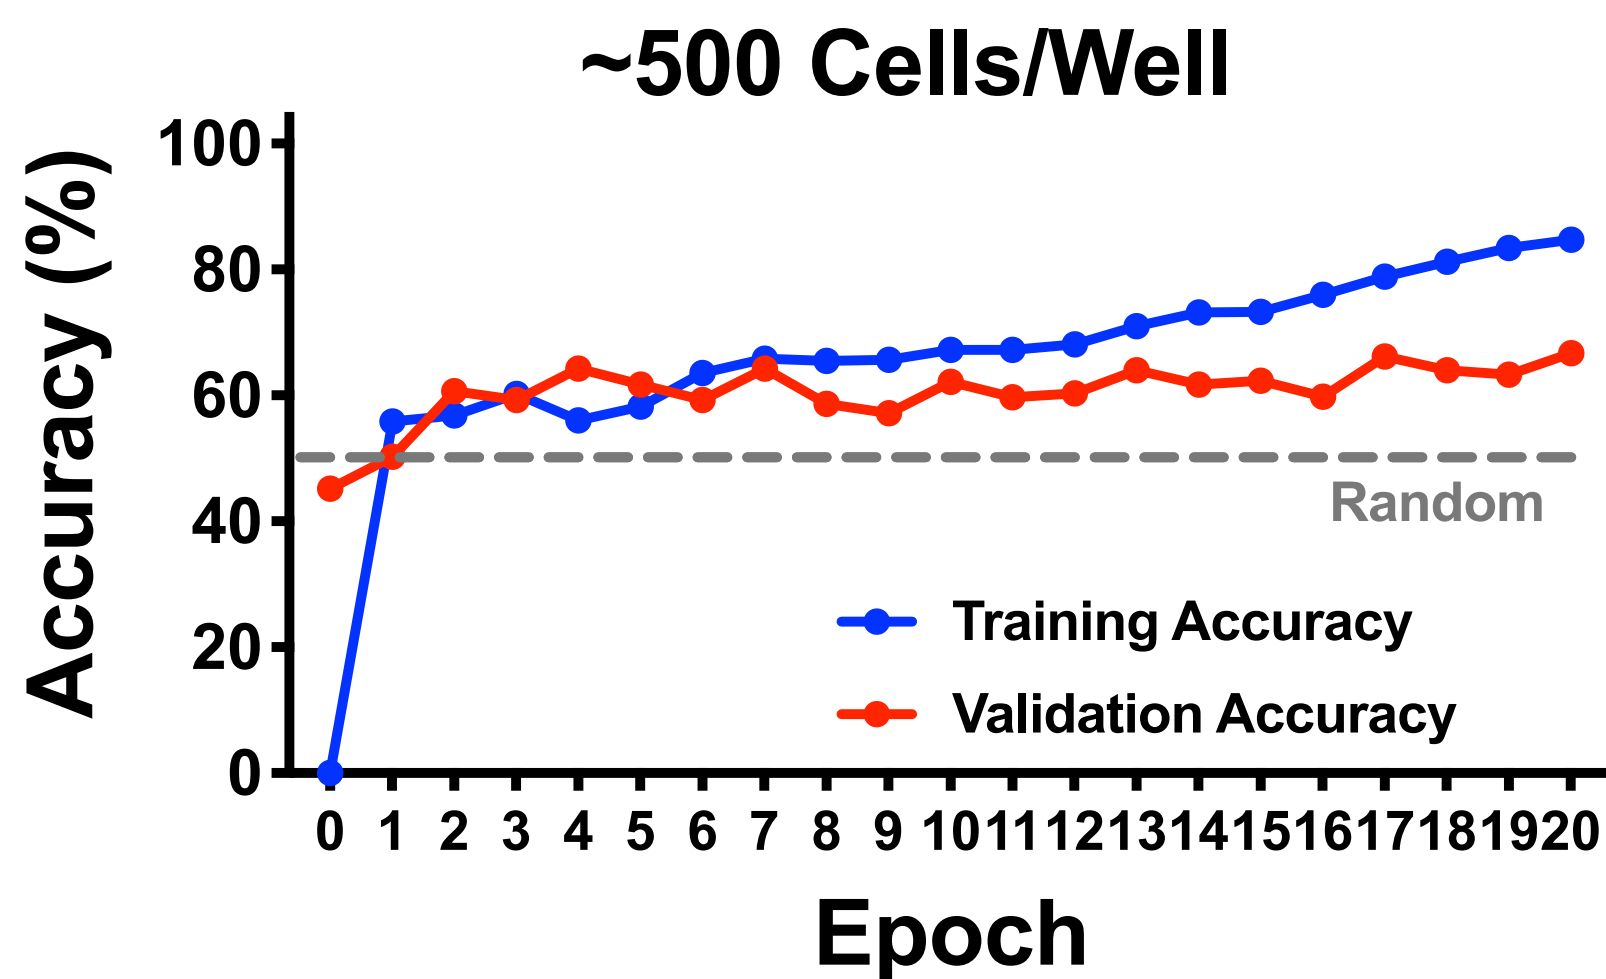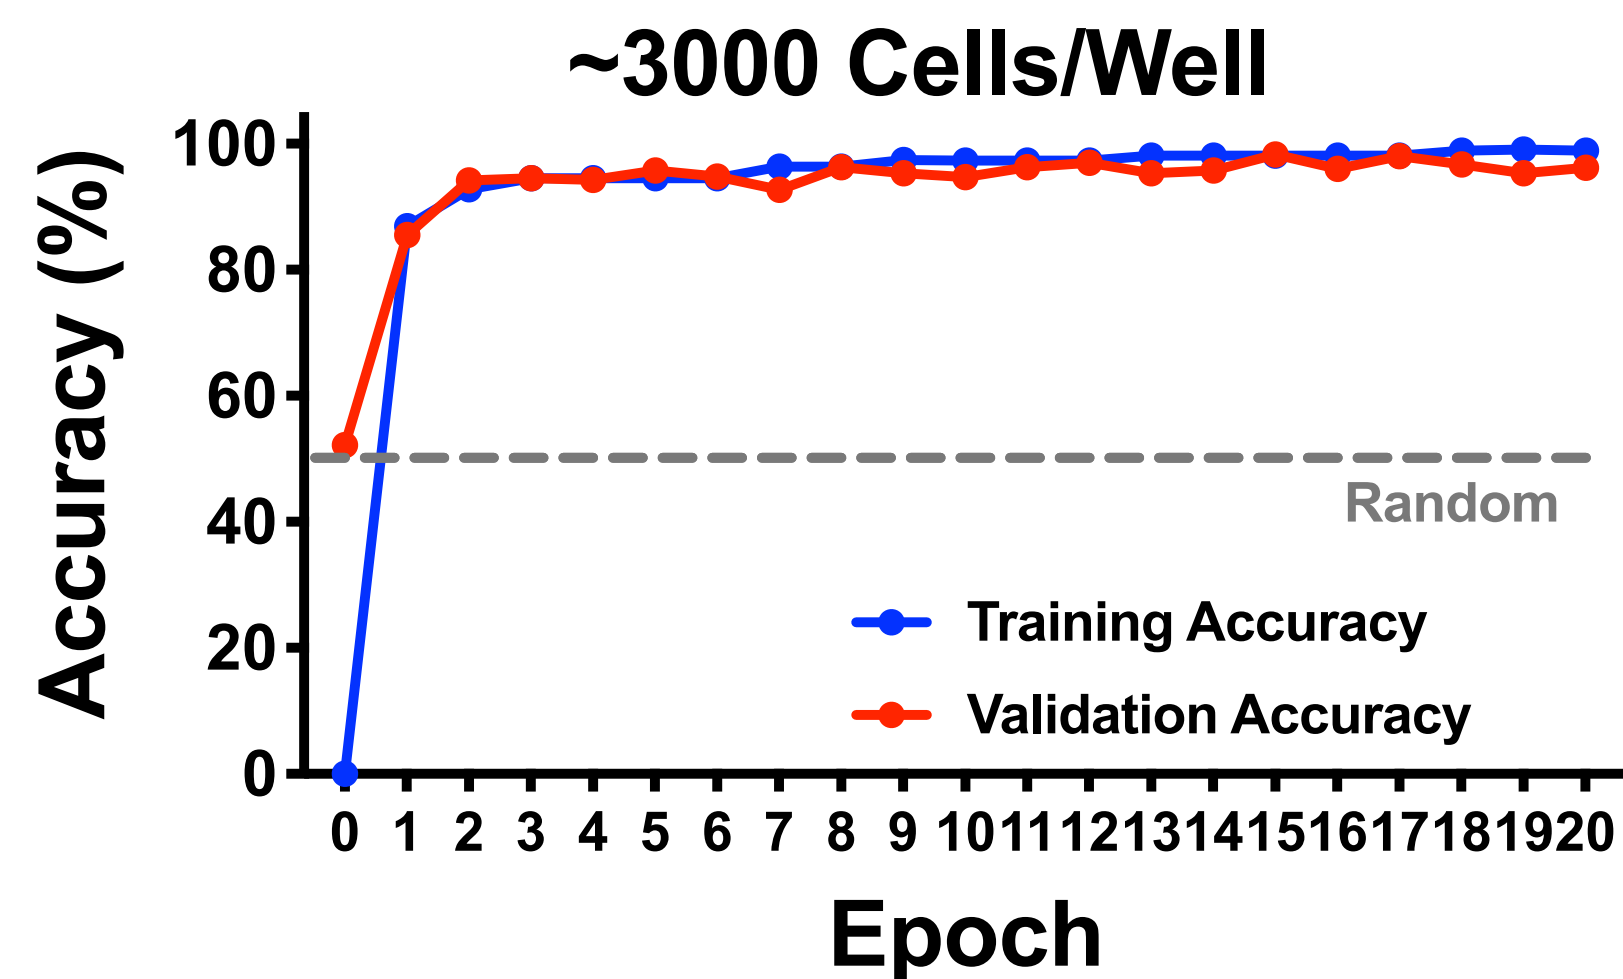

D

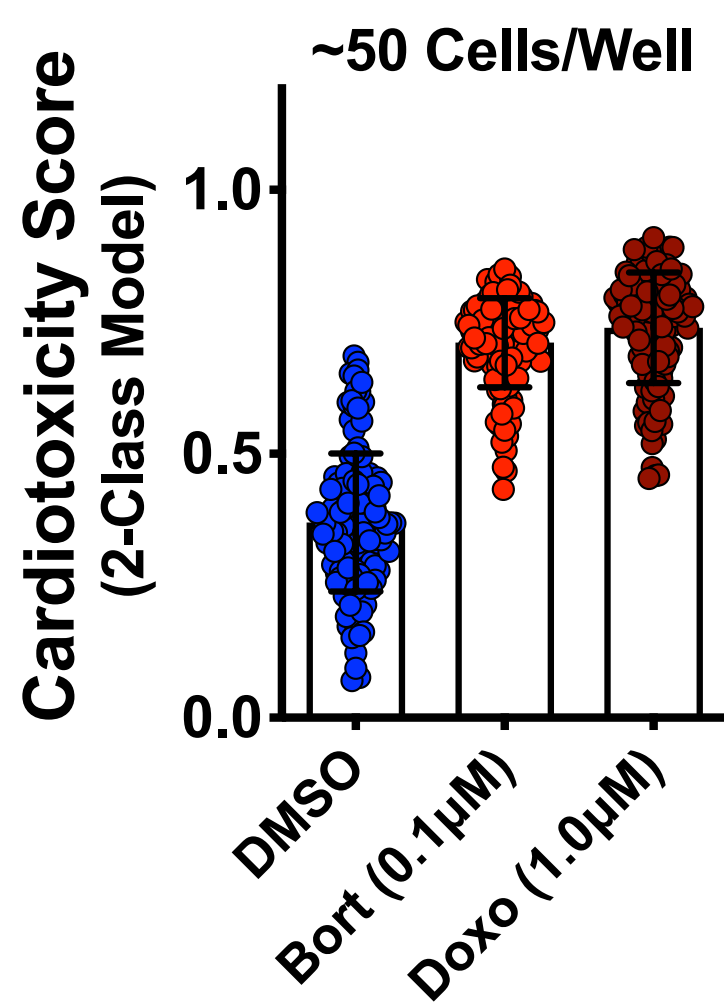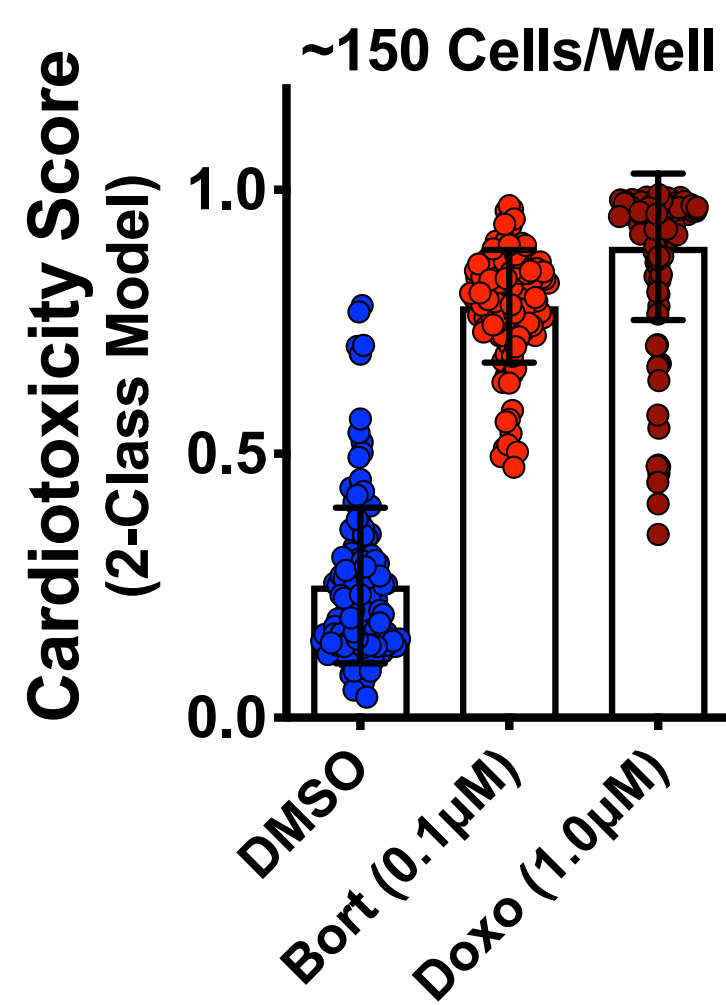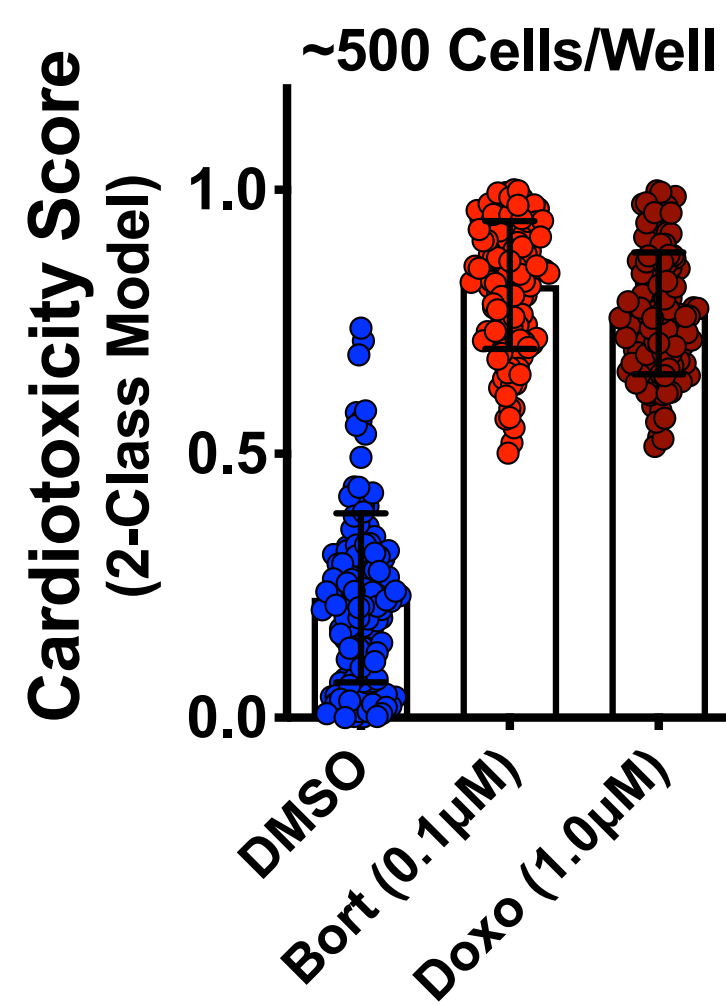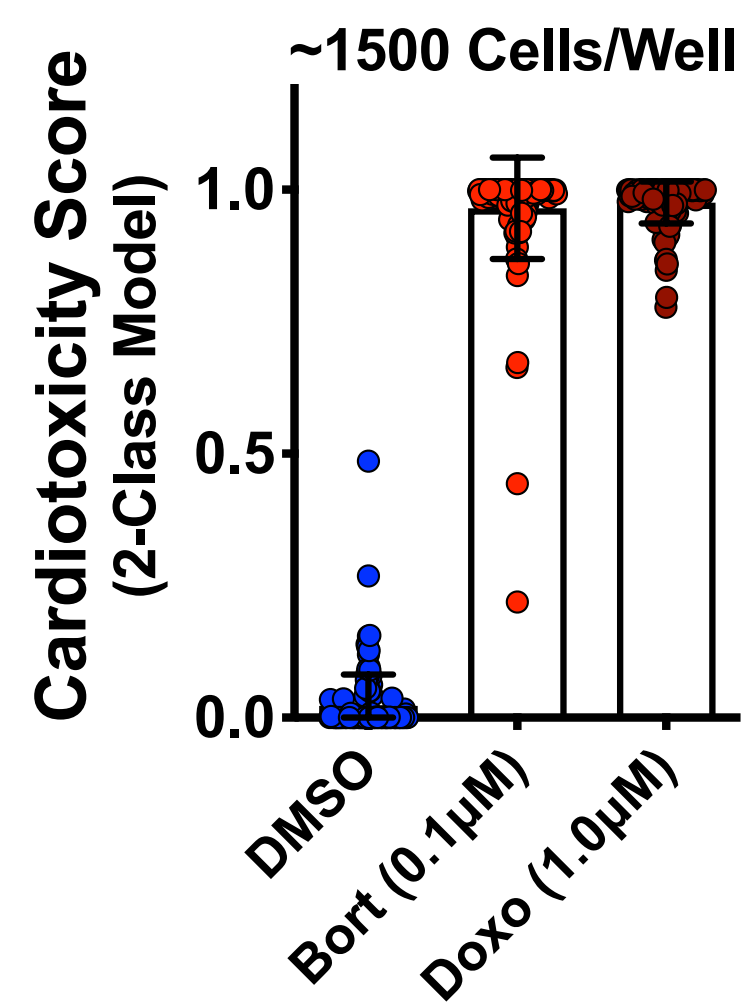

Supplement: supp [file elife-68714-supp-v1.zip]

**A****0.3 $\mu$ M Dose**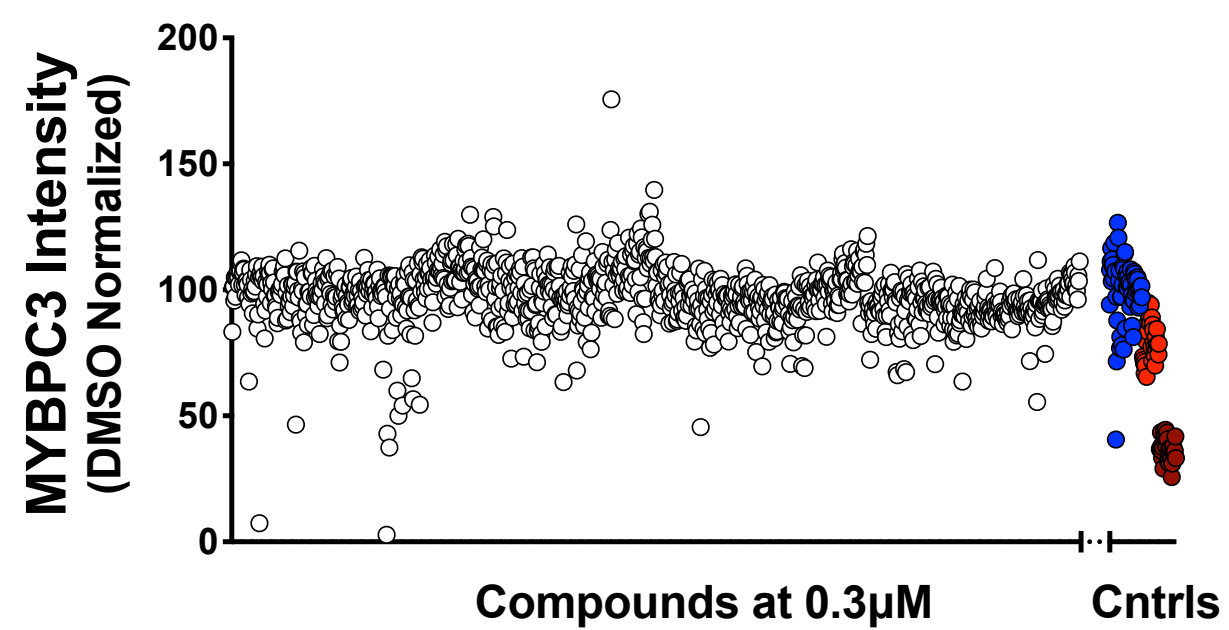**1.0 $\mu$ M Dose**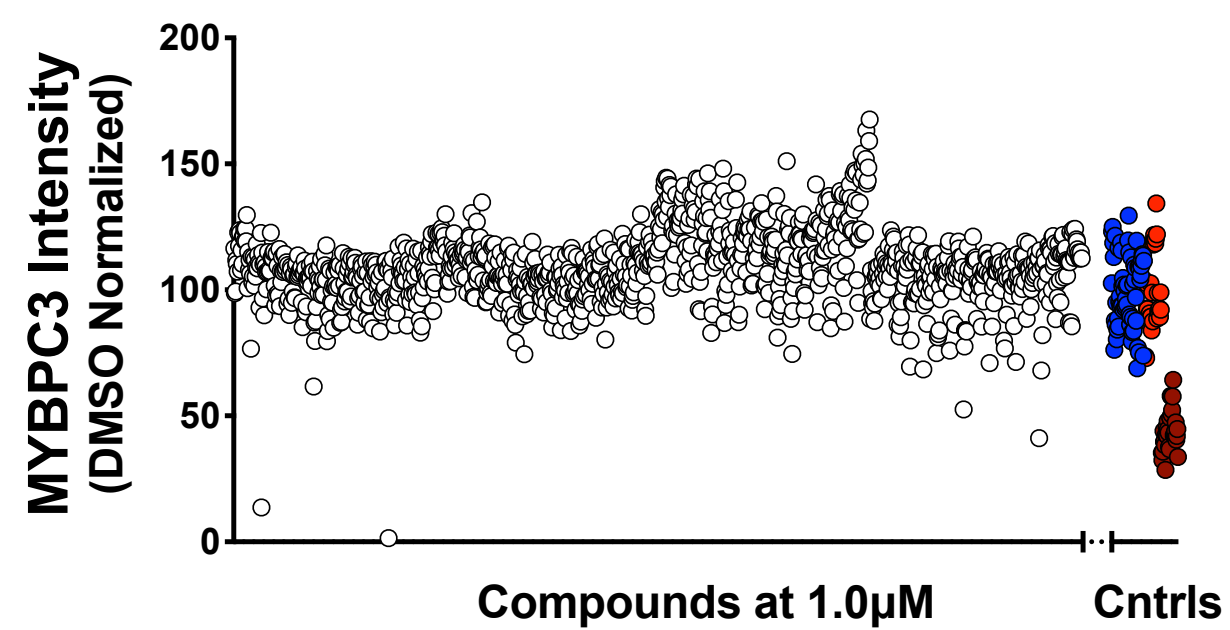**3.0 $\mu$ M Dose**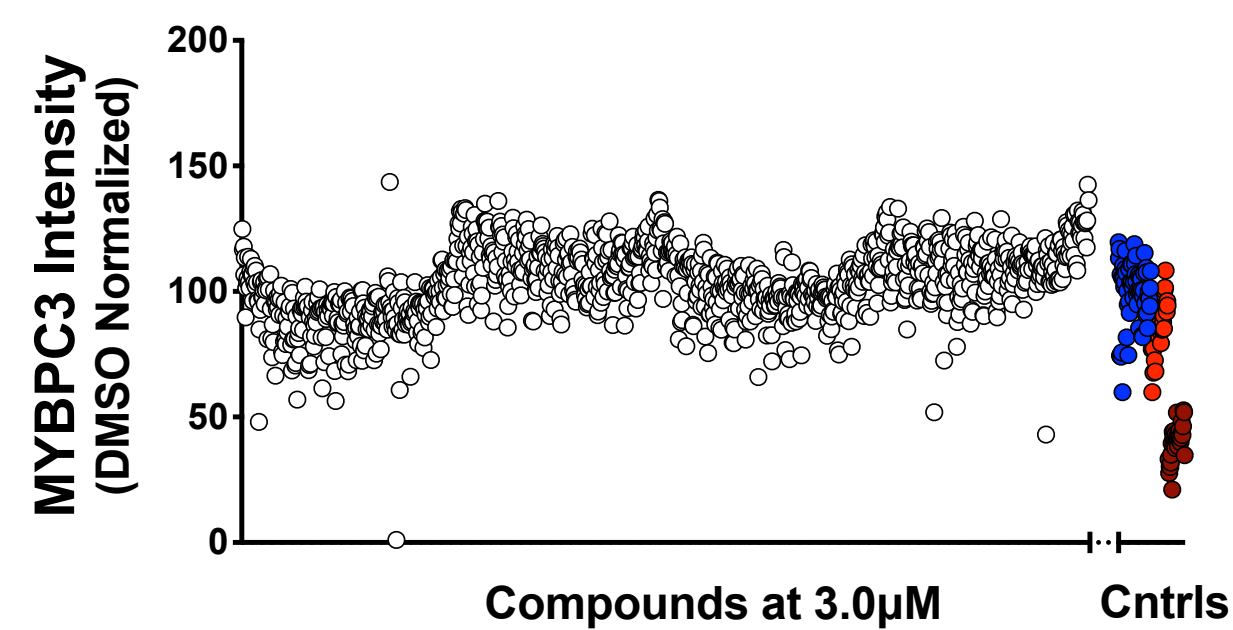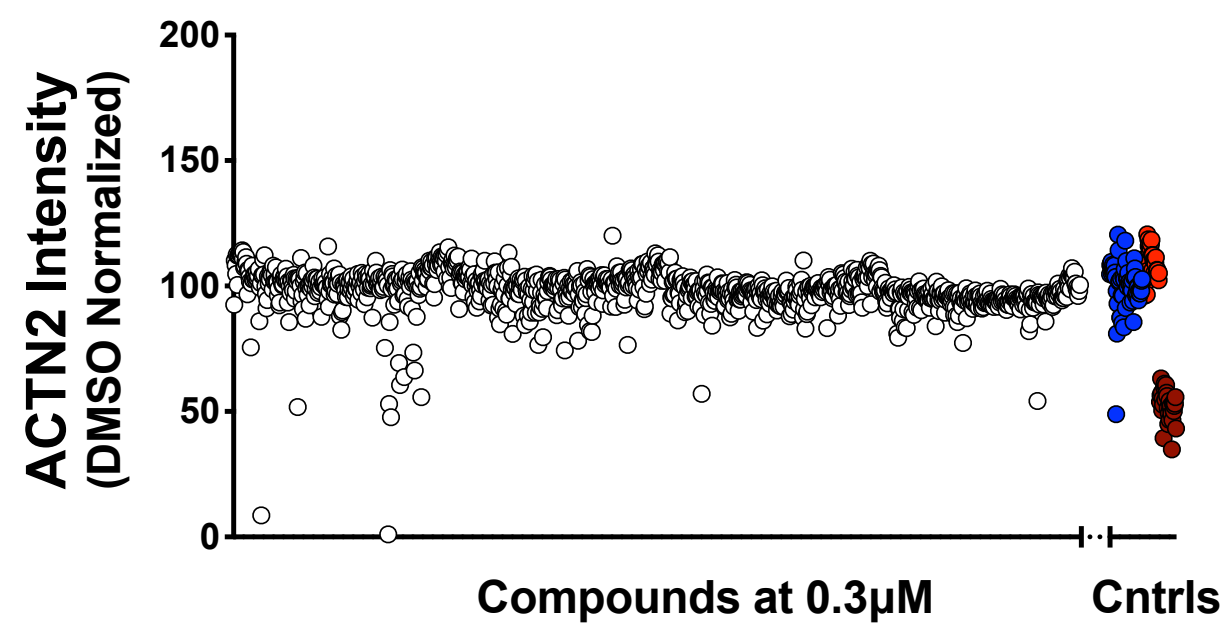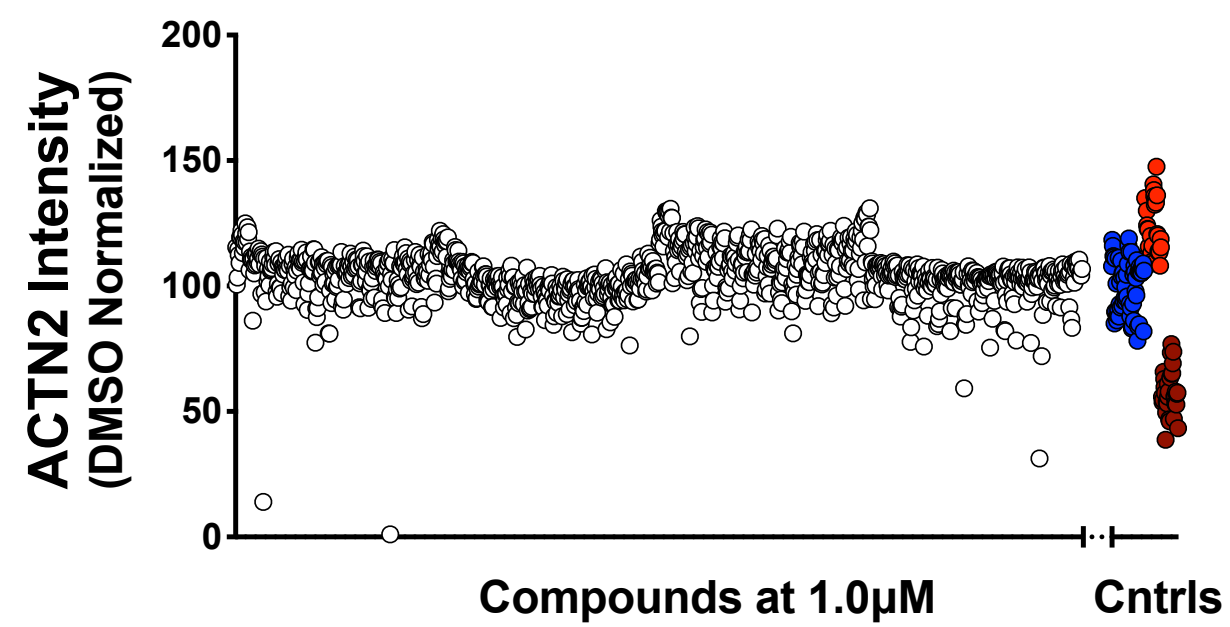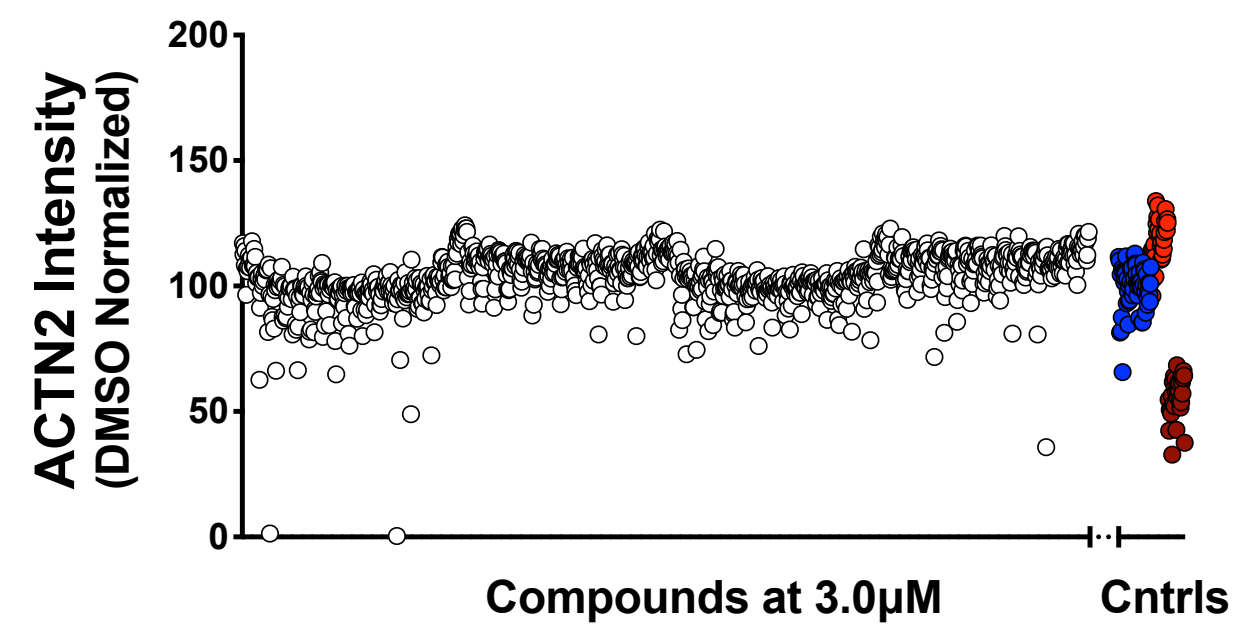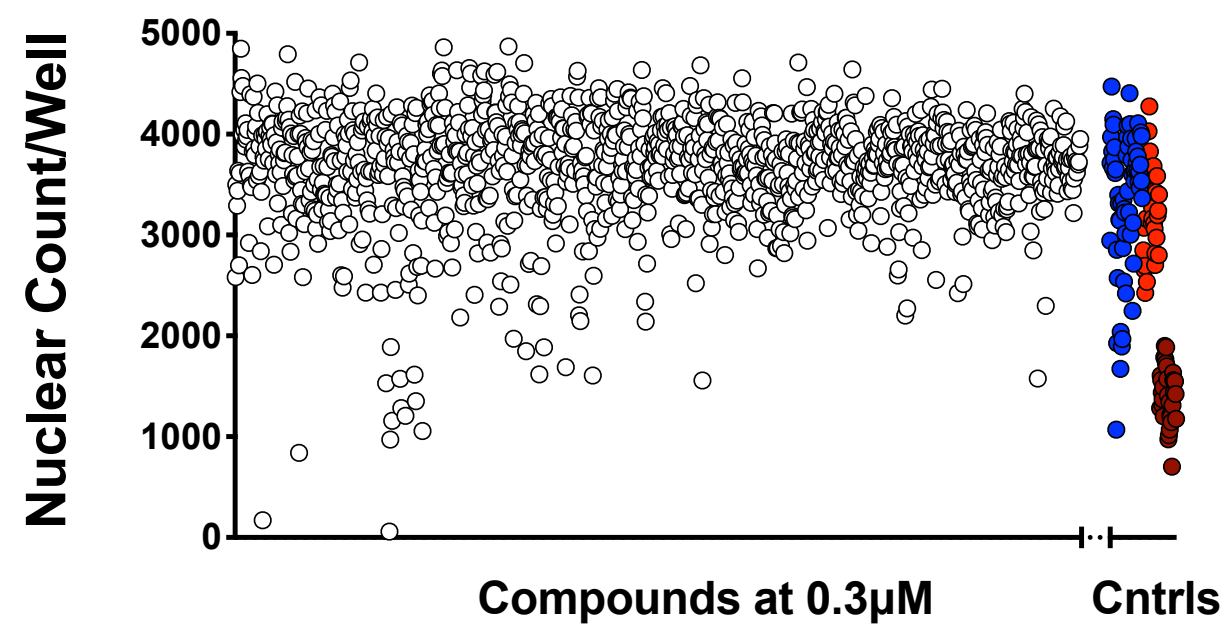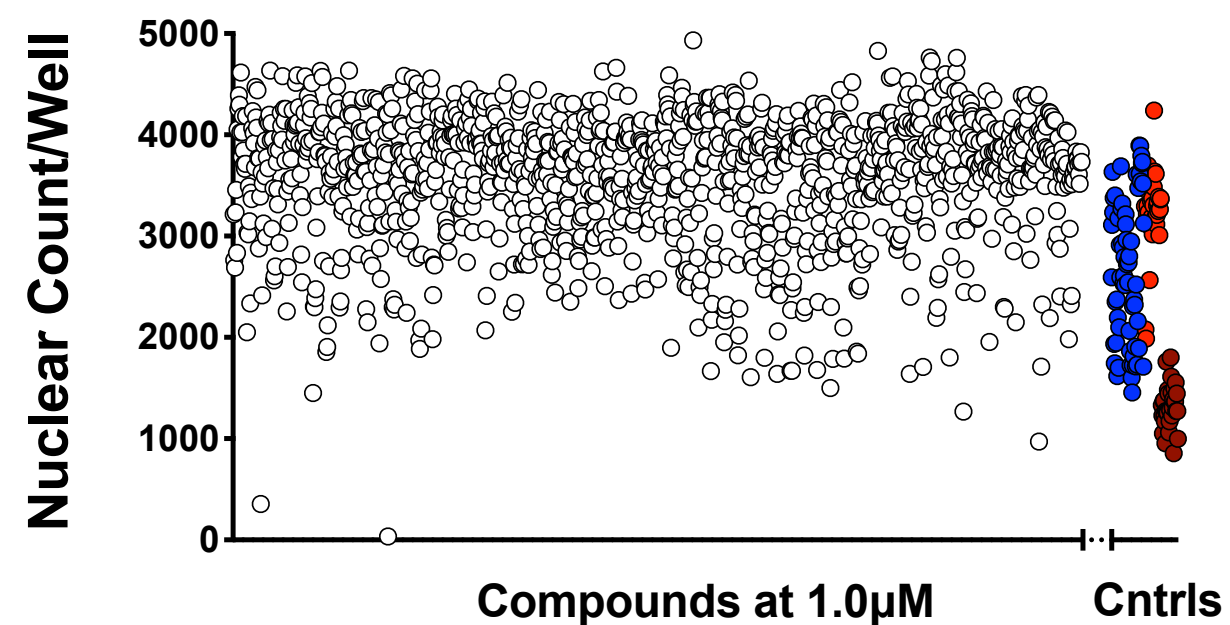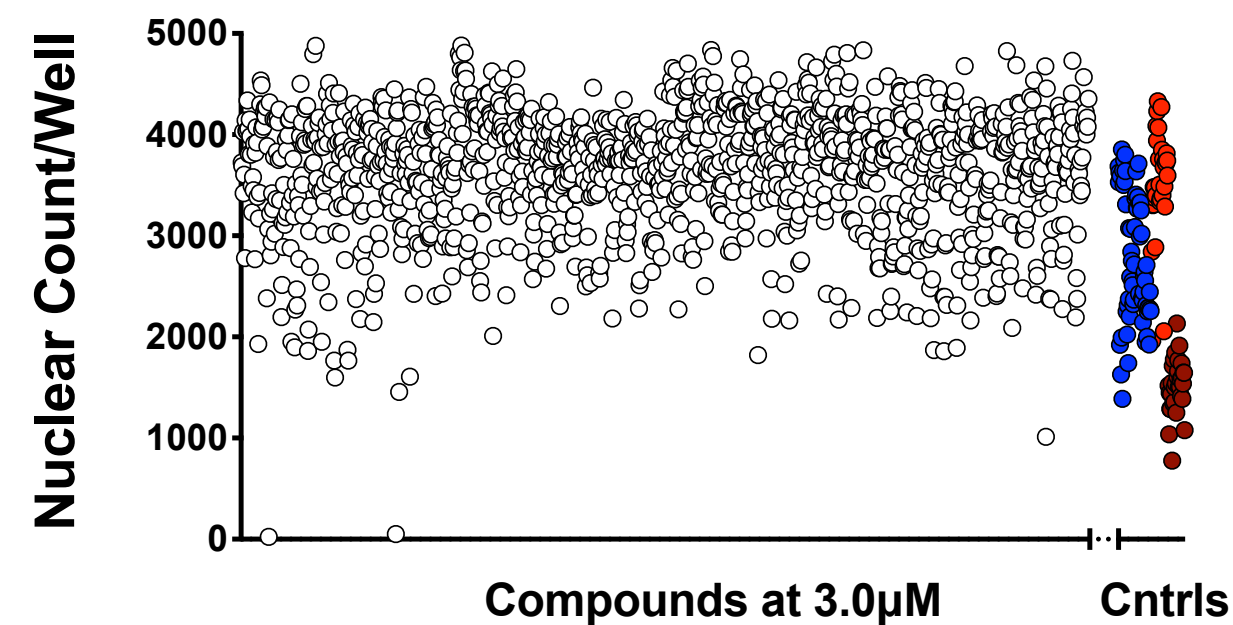**B**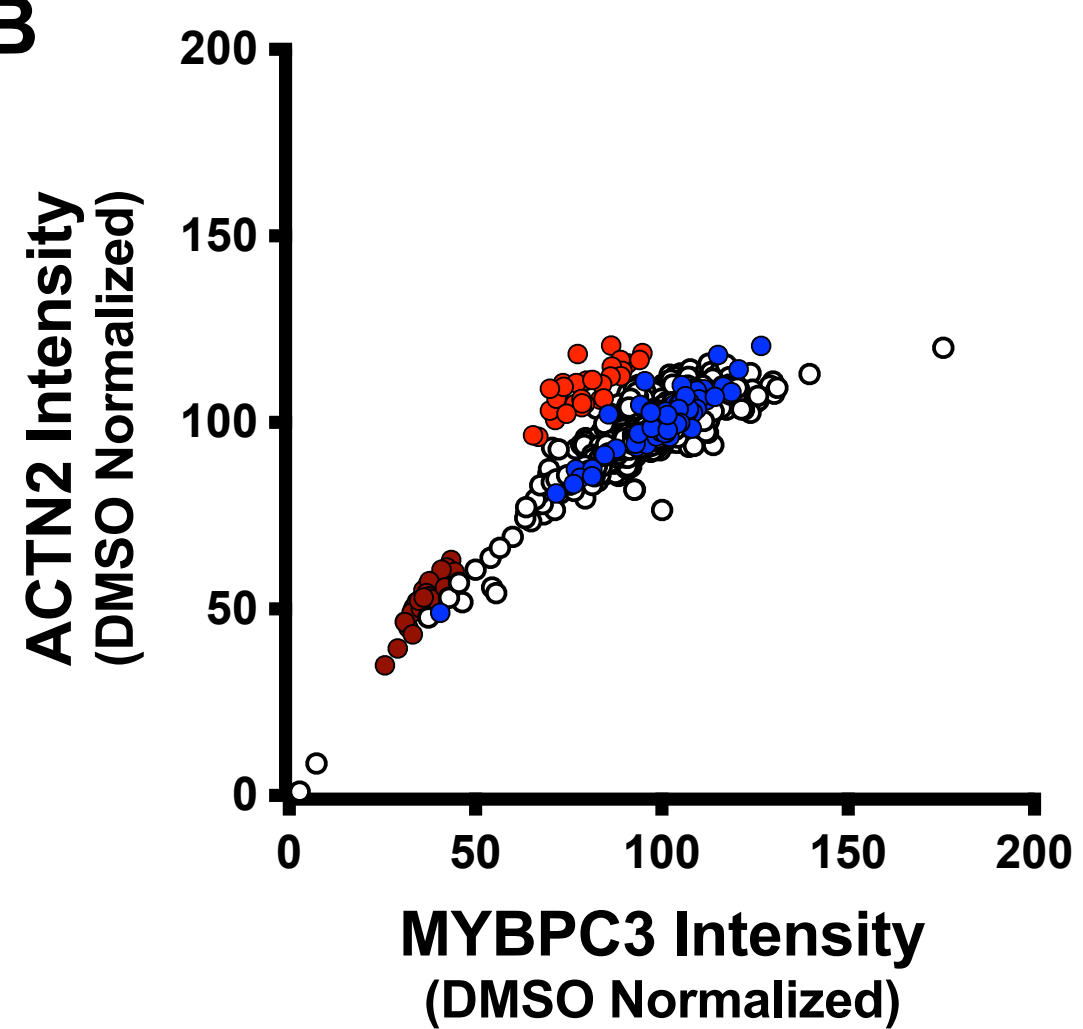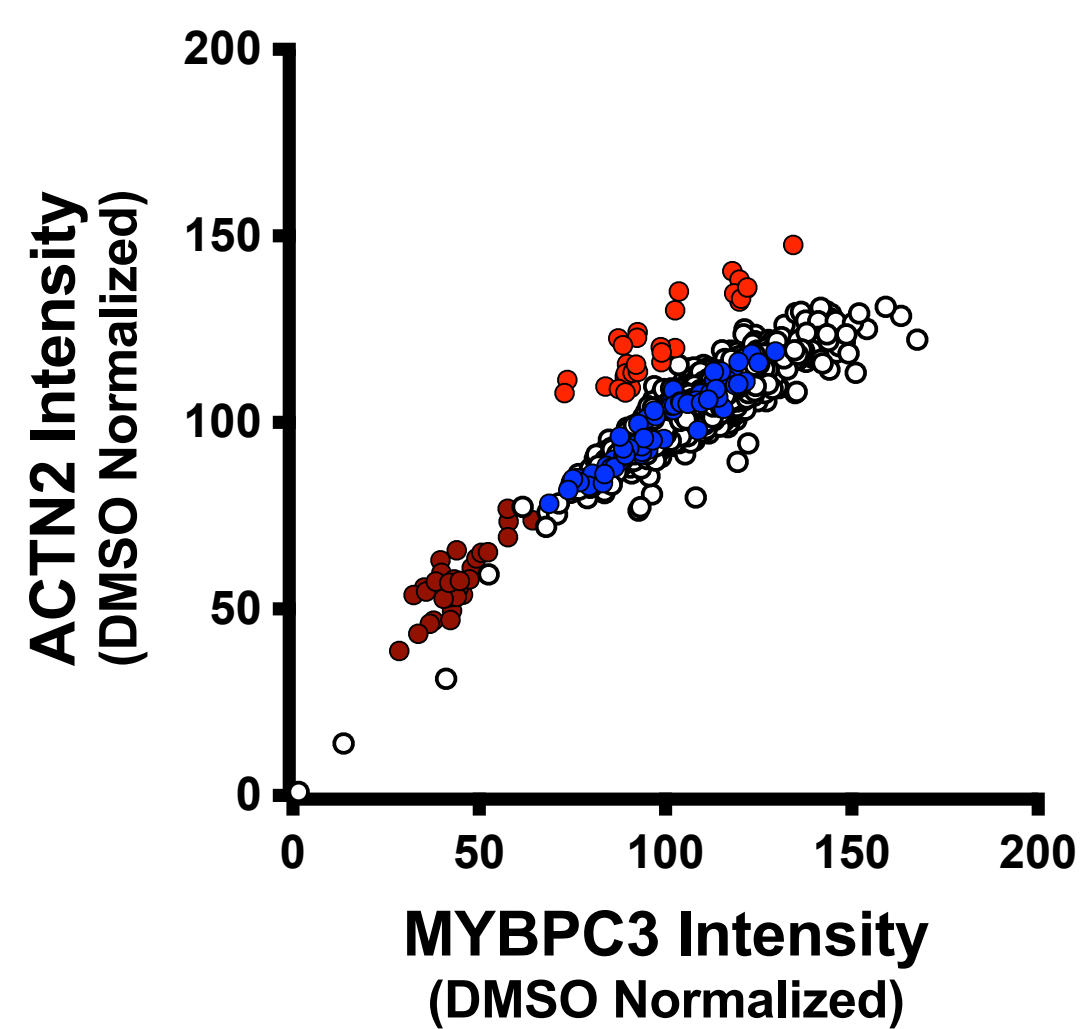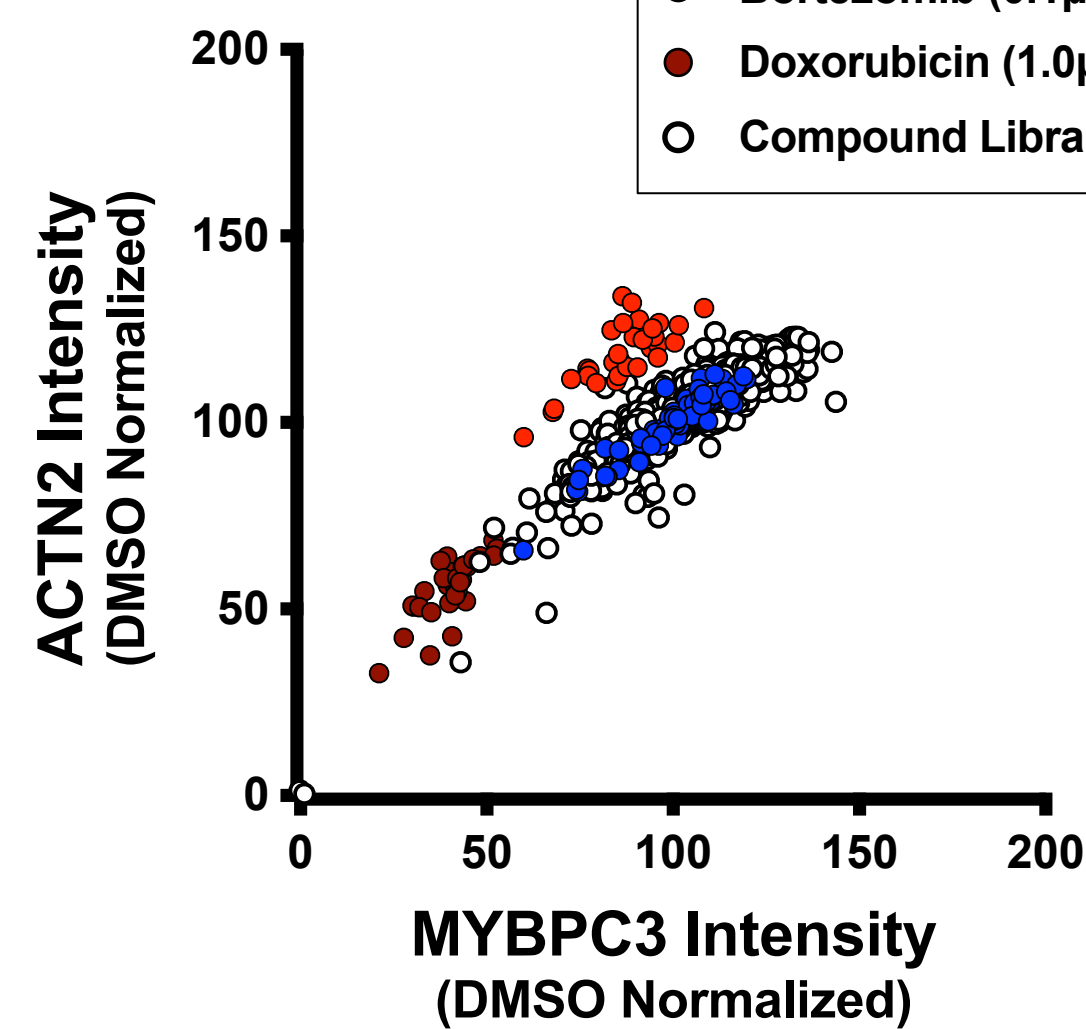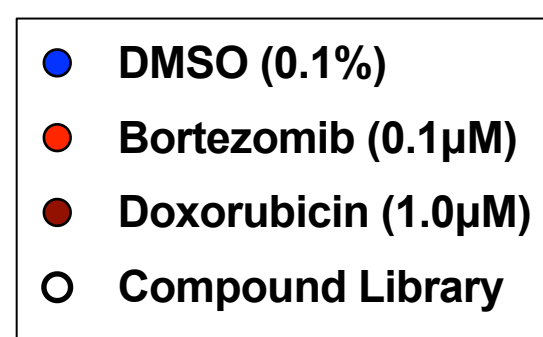

Supplement: supp [file elife-68714-supp-v1.zip]

**A**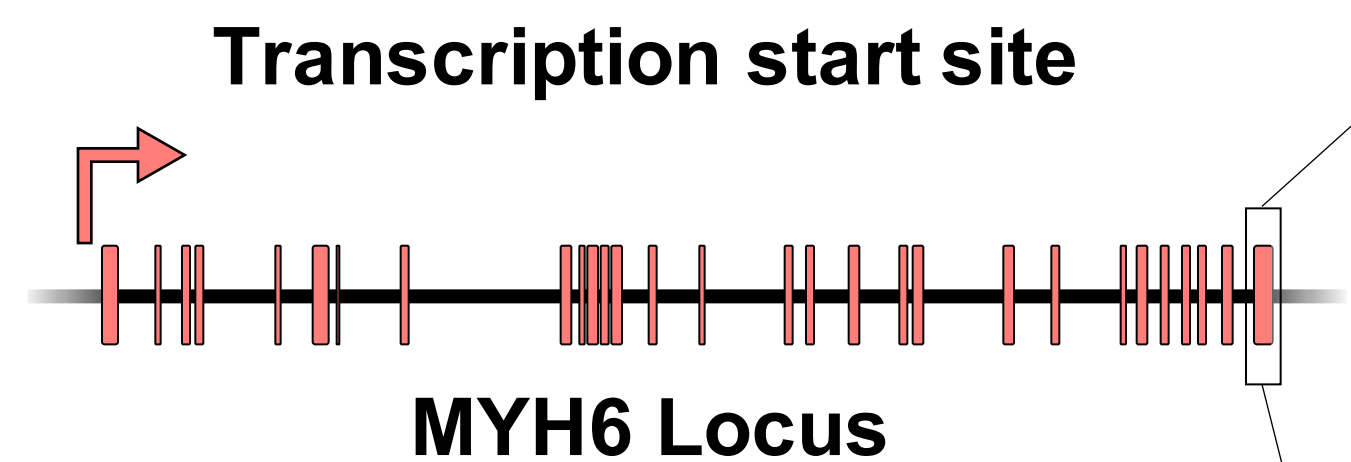**B**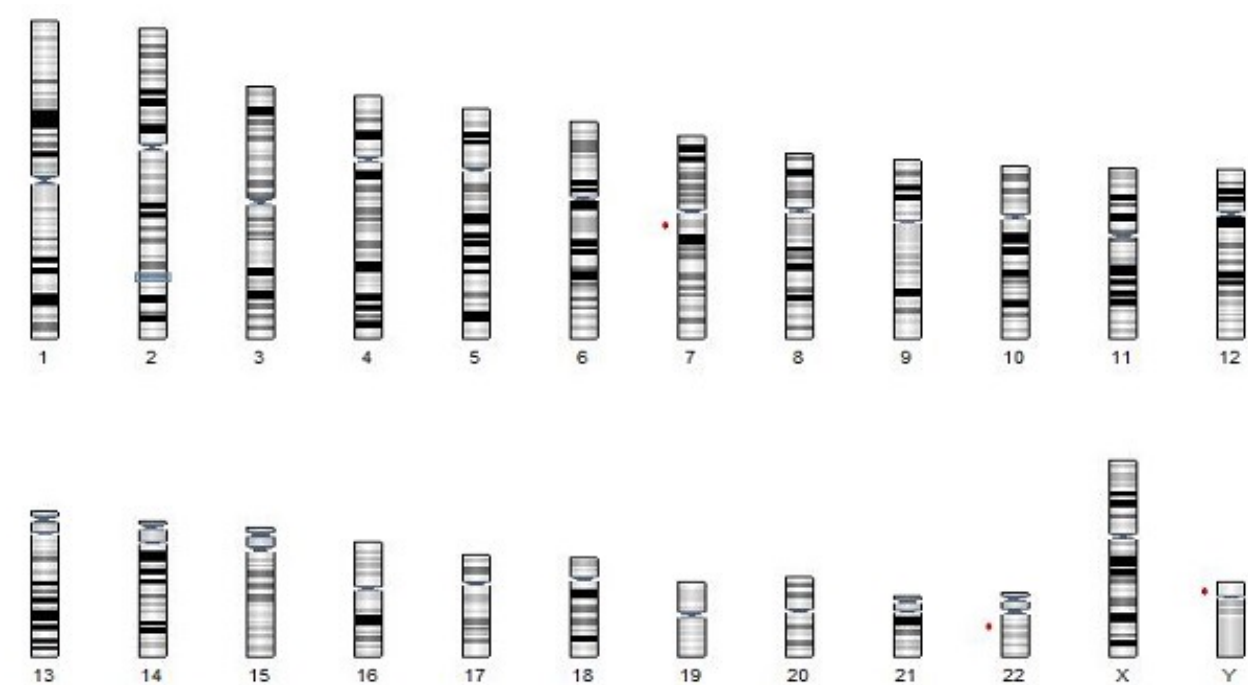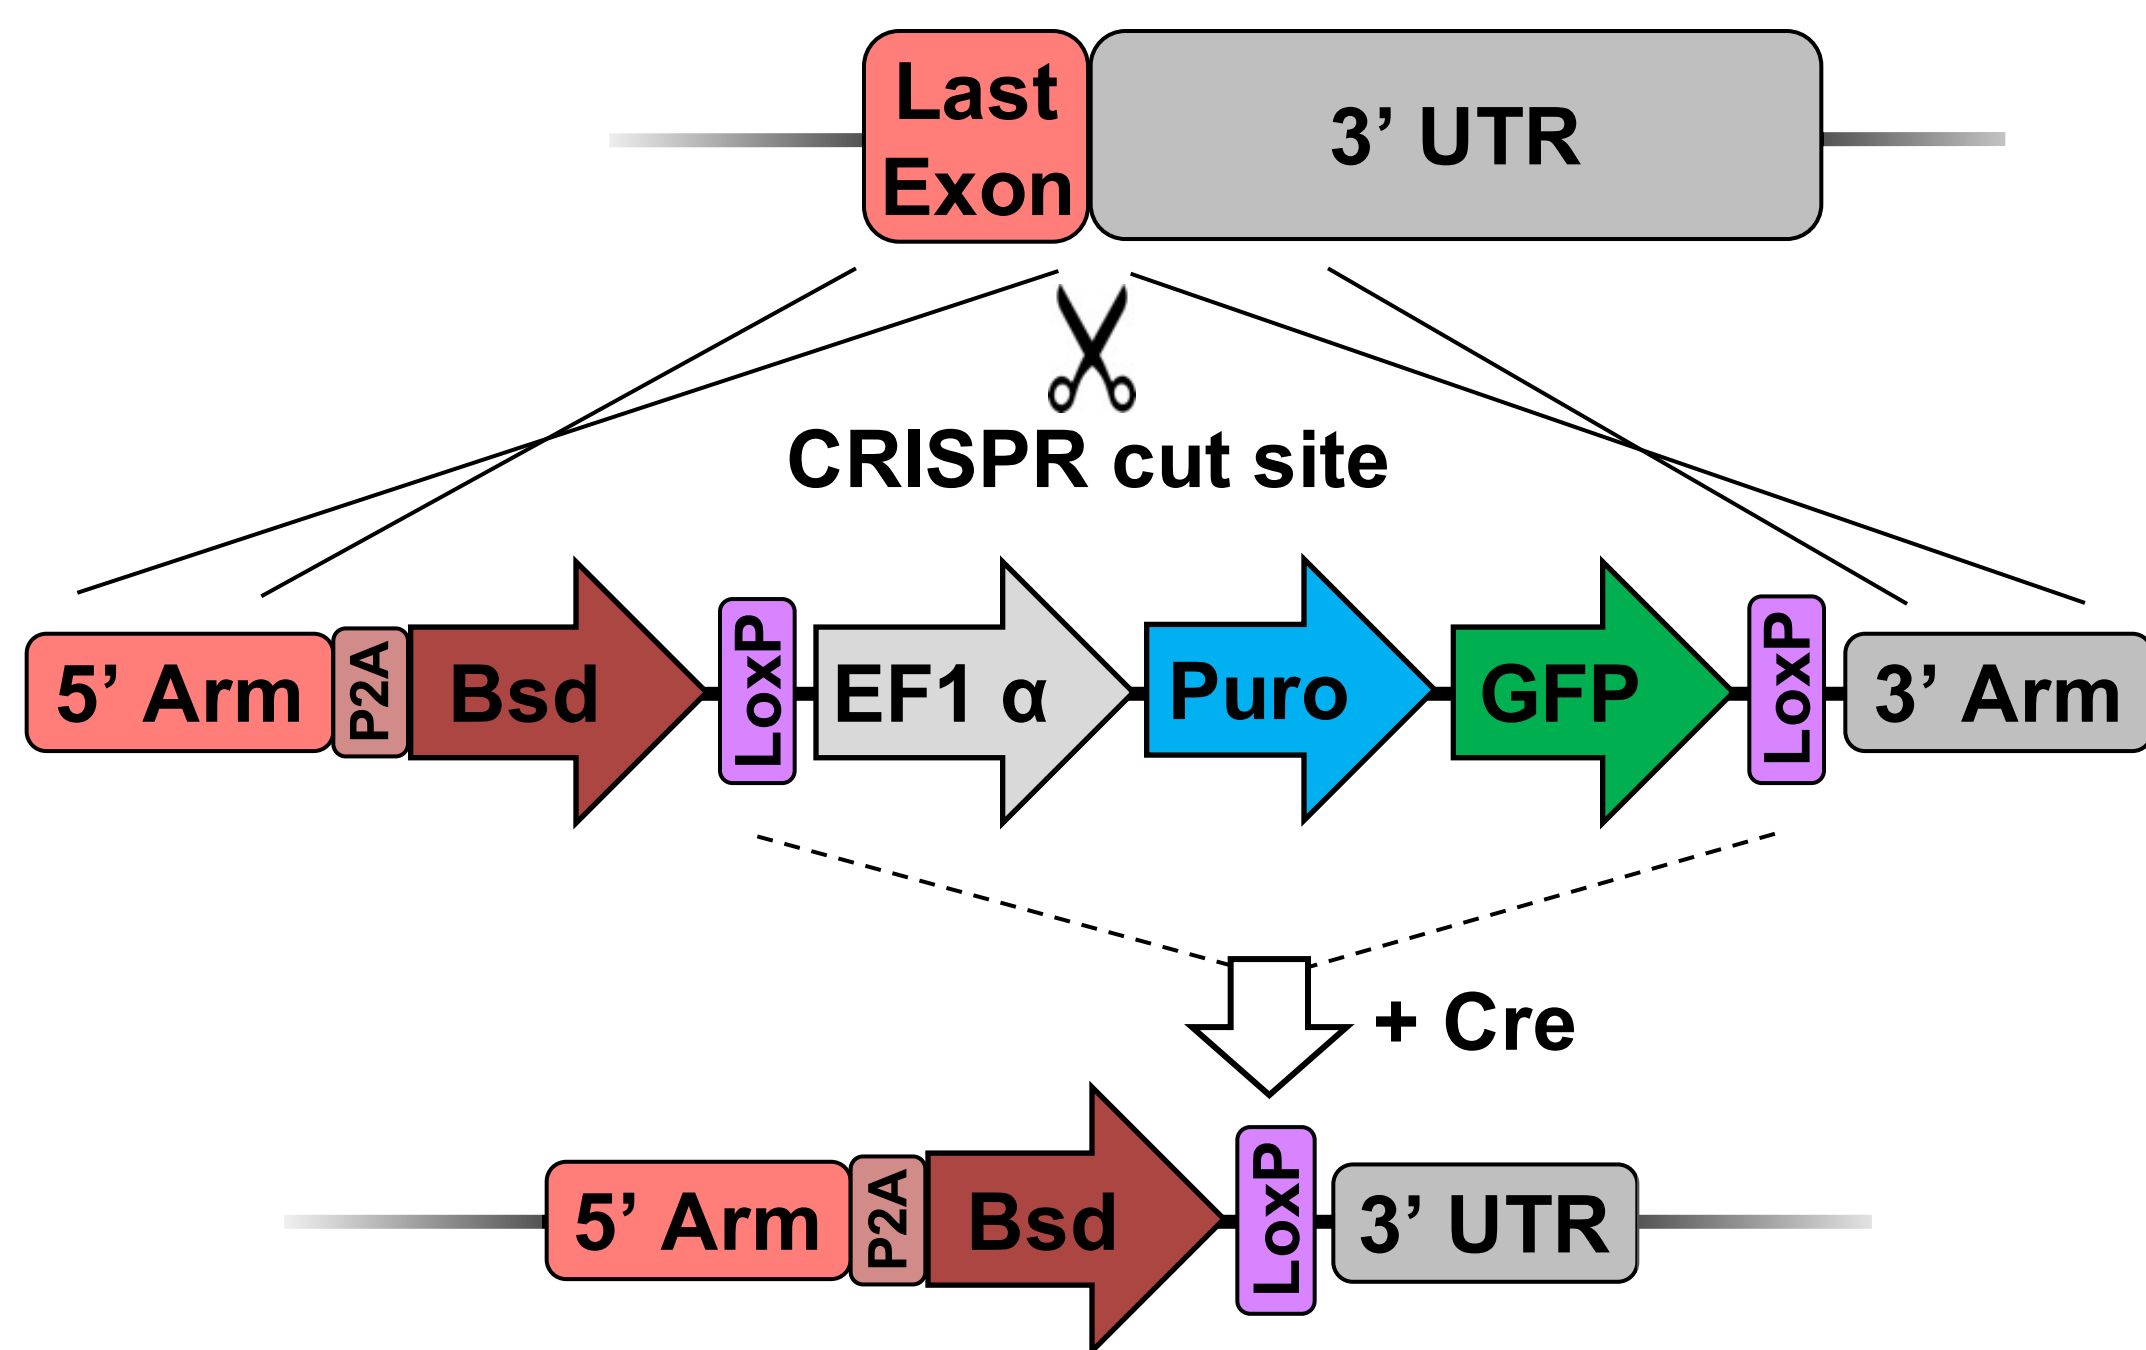**C**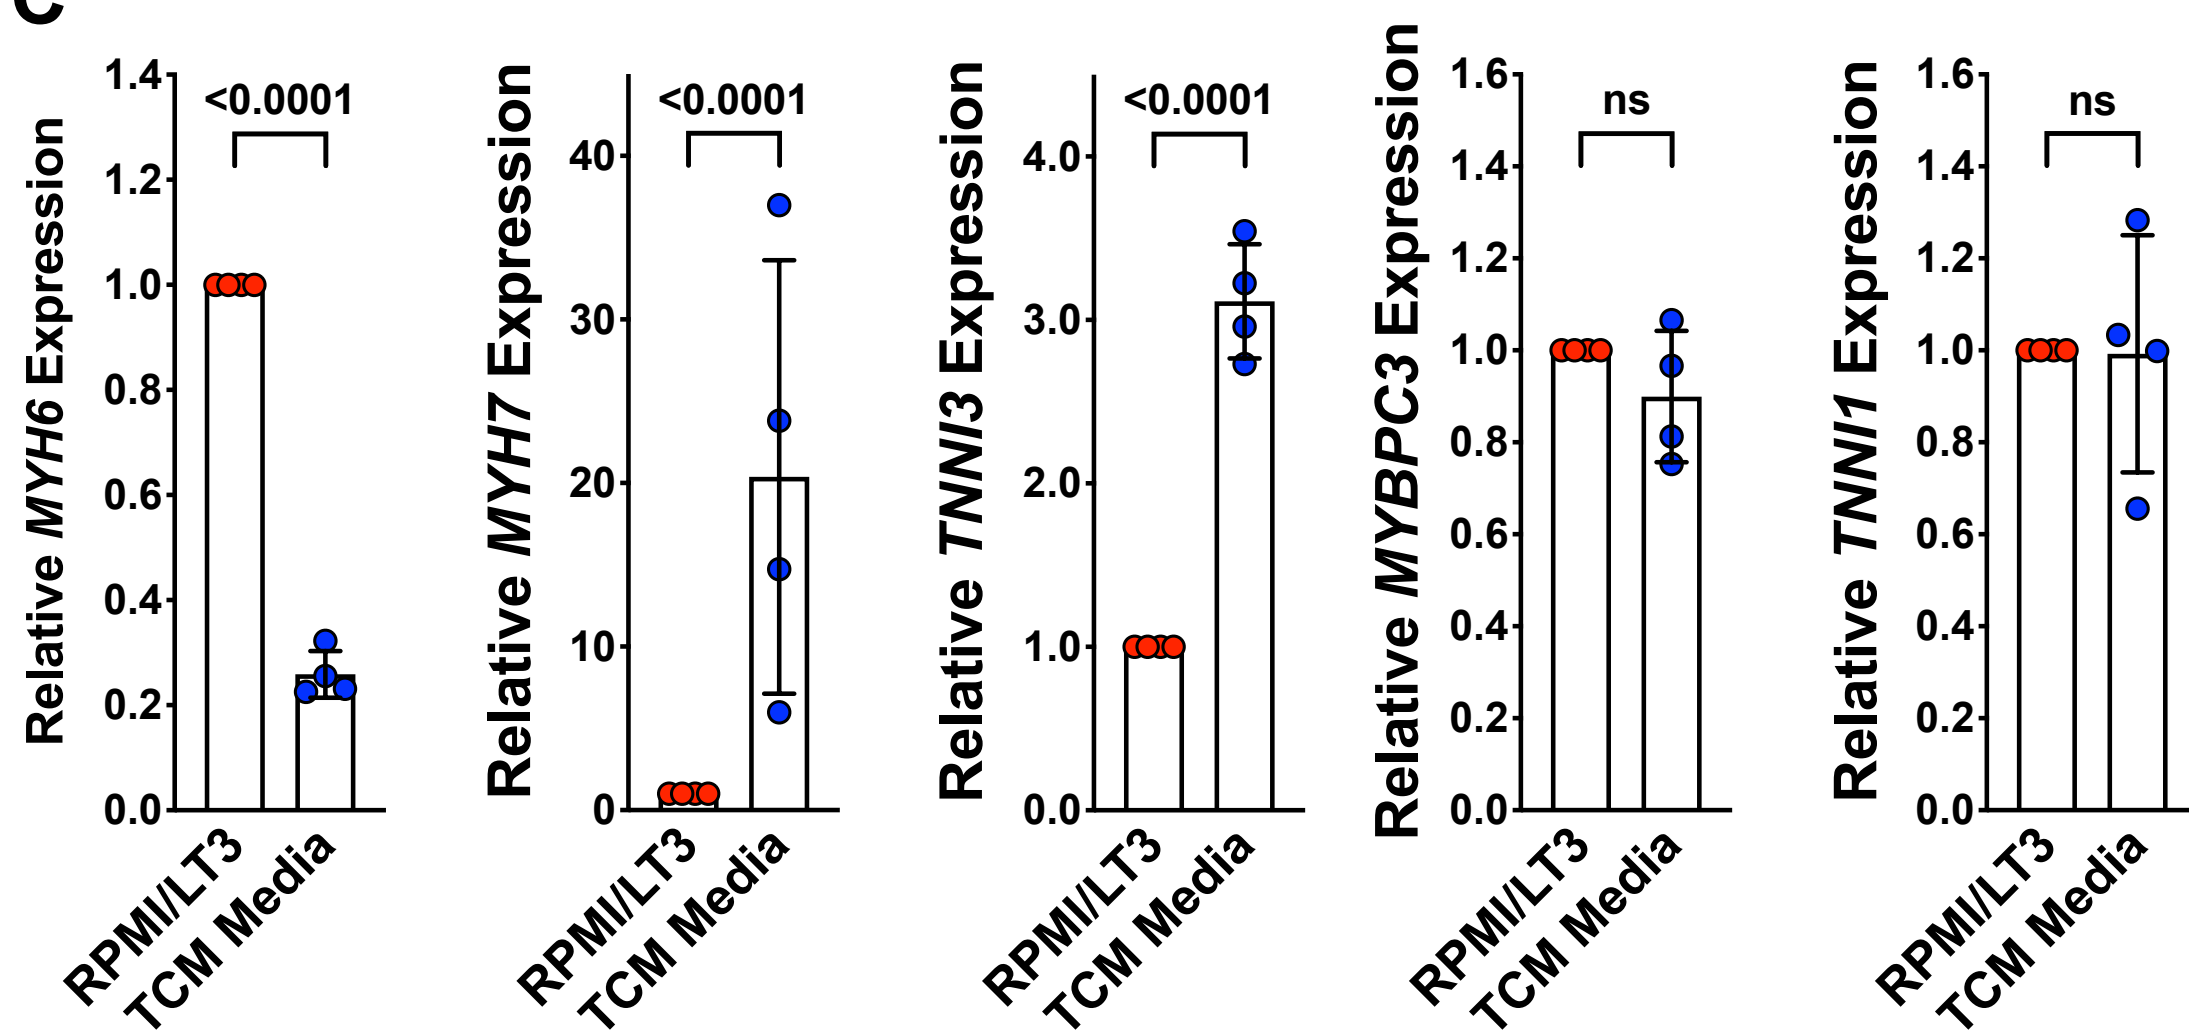**D**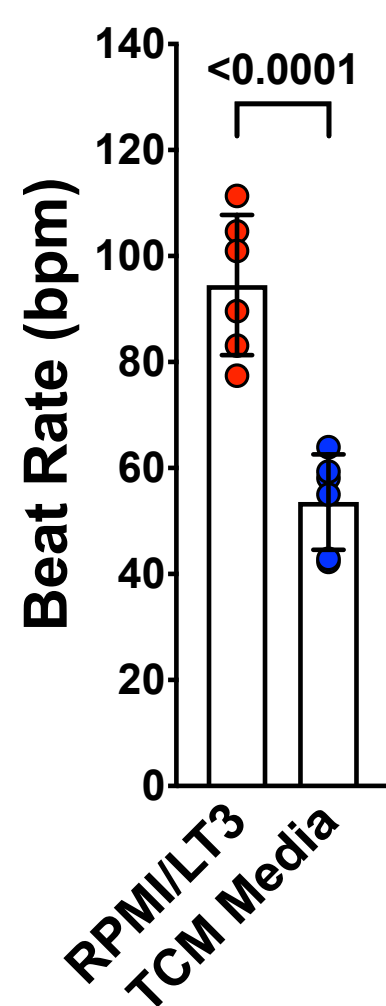**E**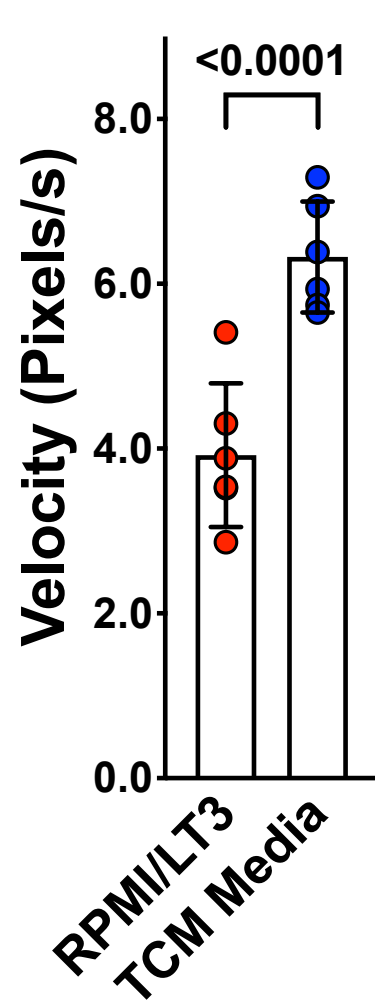**F**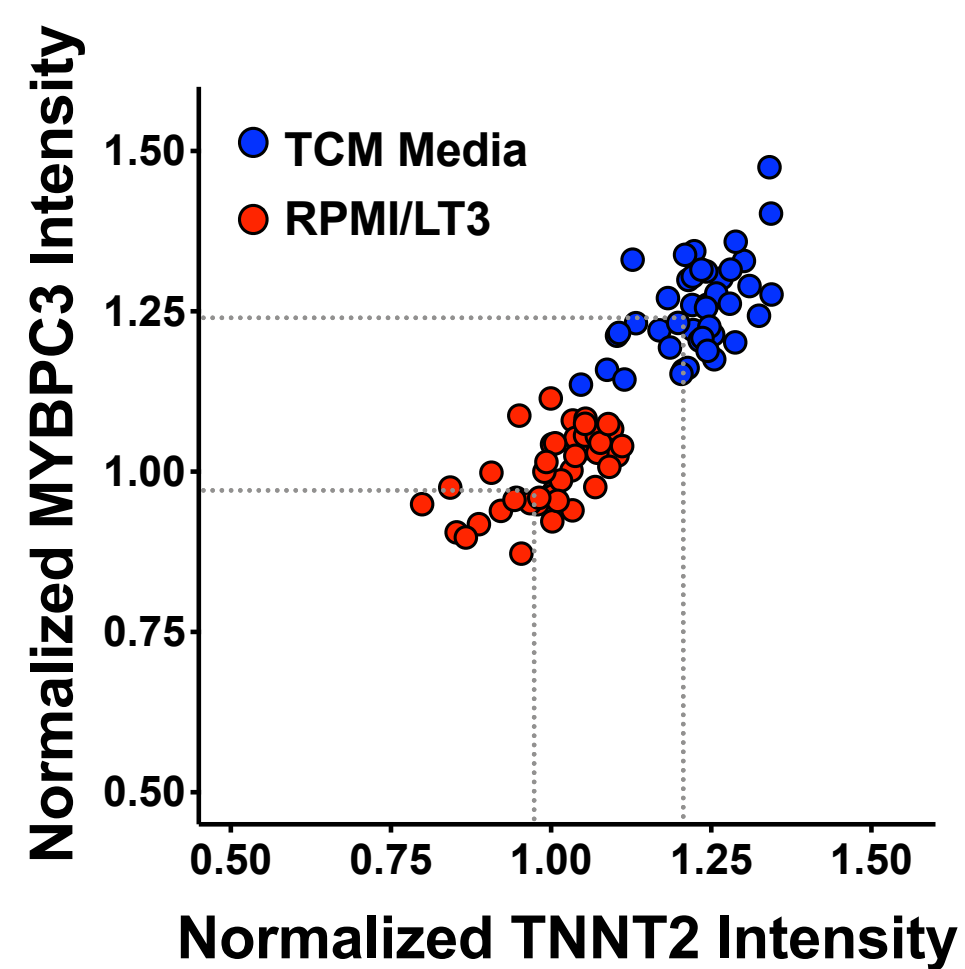**G**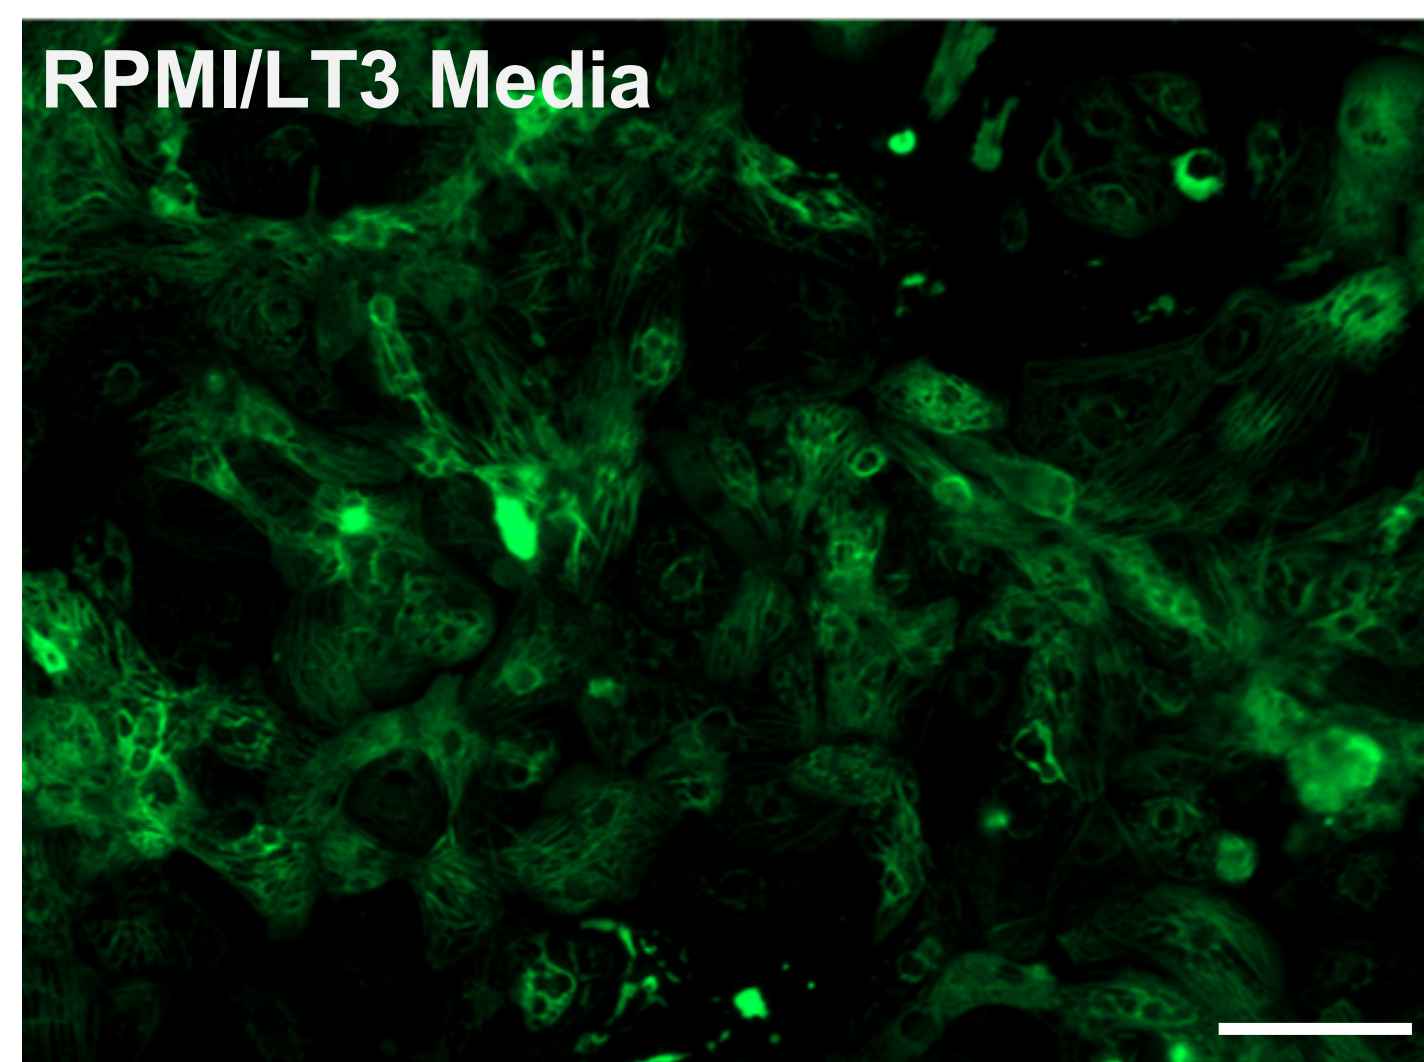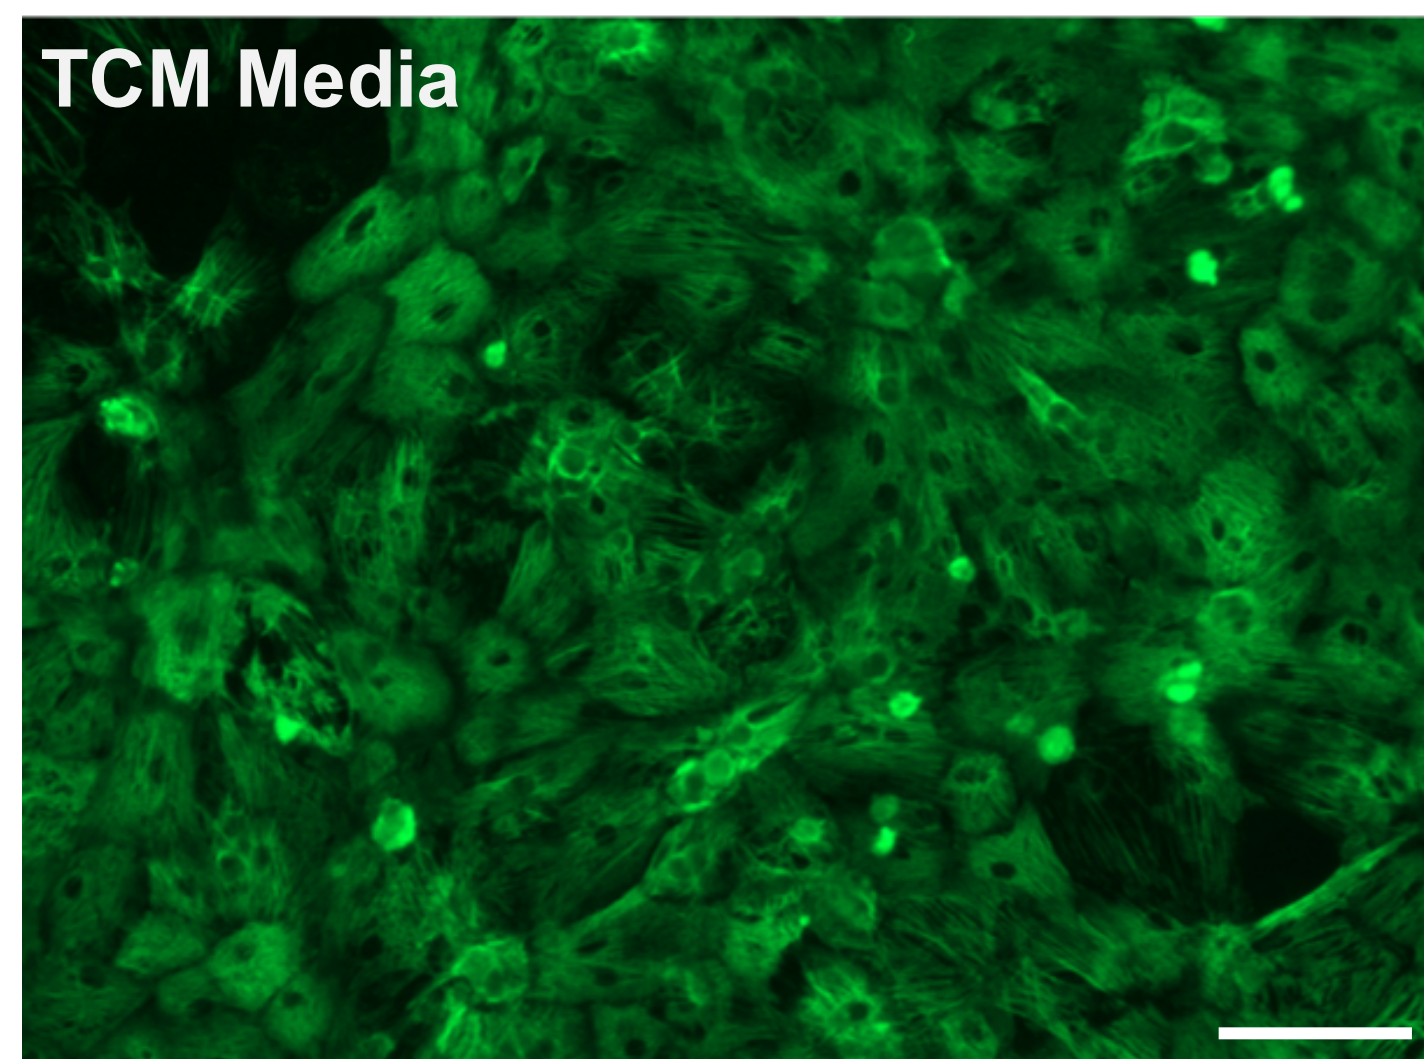

Supplement: supp [file elife-68714-supp-v1.zip]

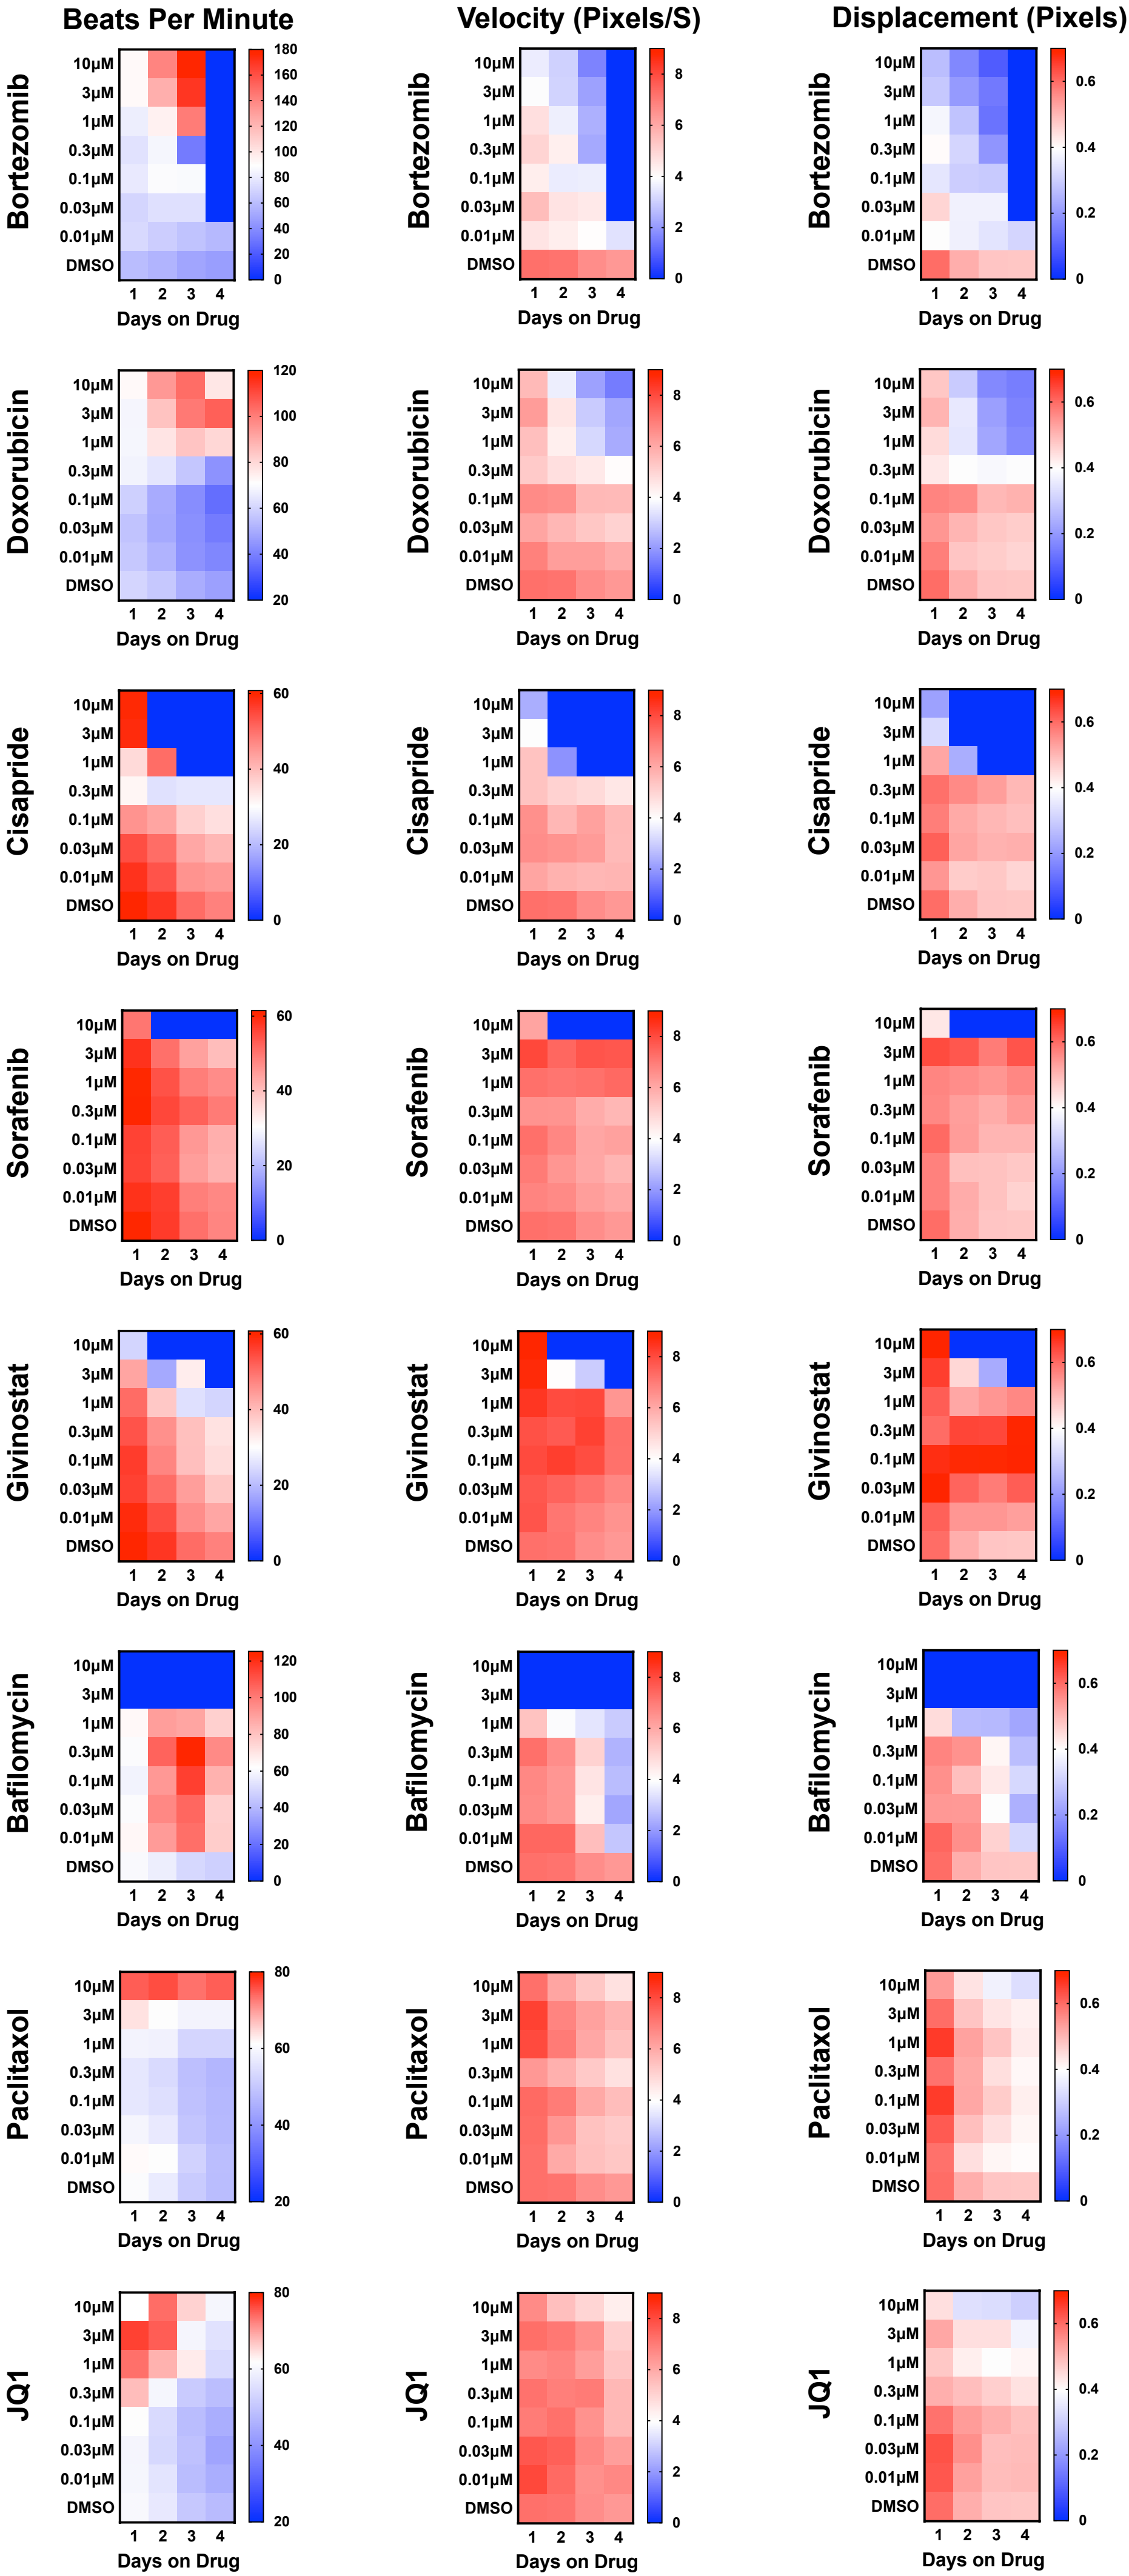

Supplement: supp [file elife-68714-supp-v1.zip]

A

Deep Learning Readout

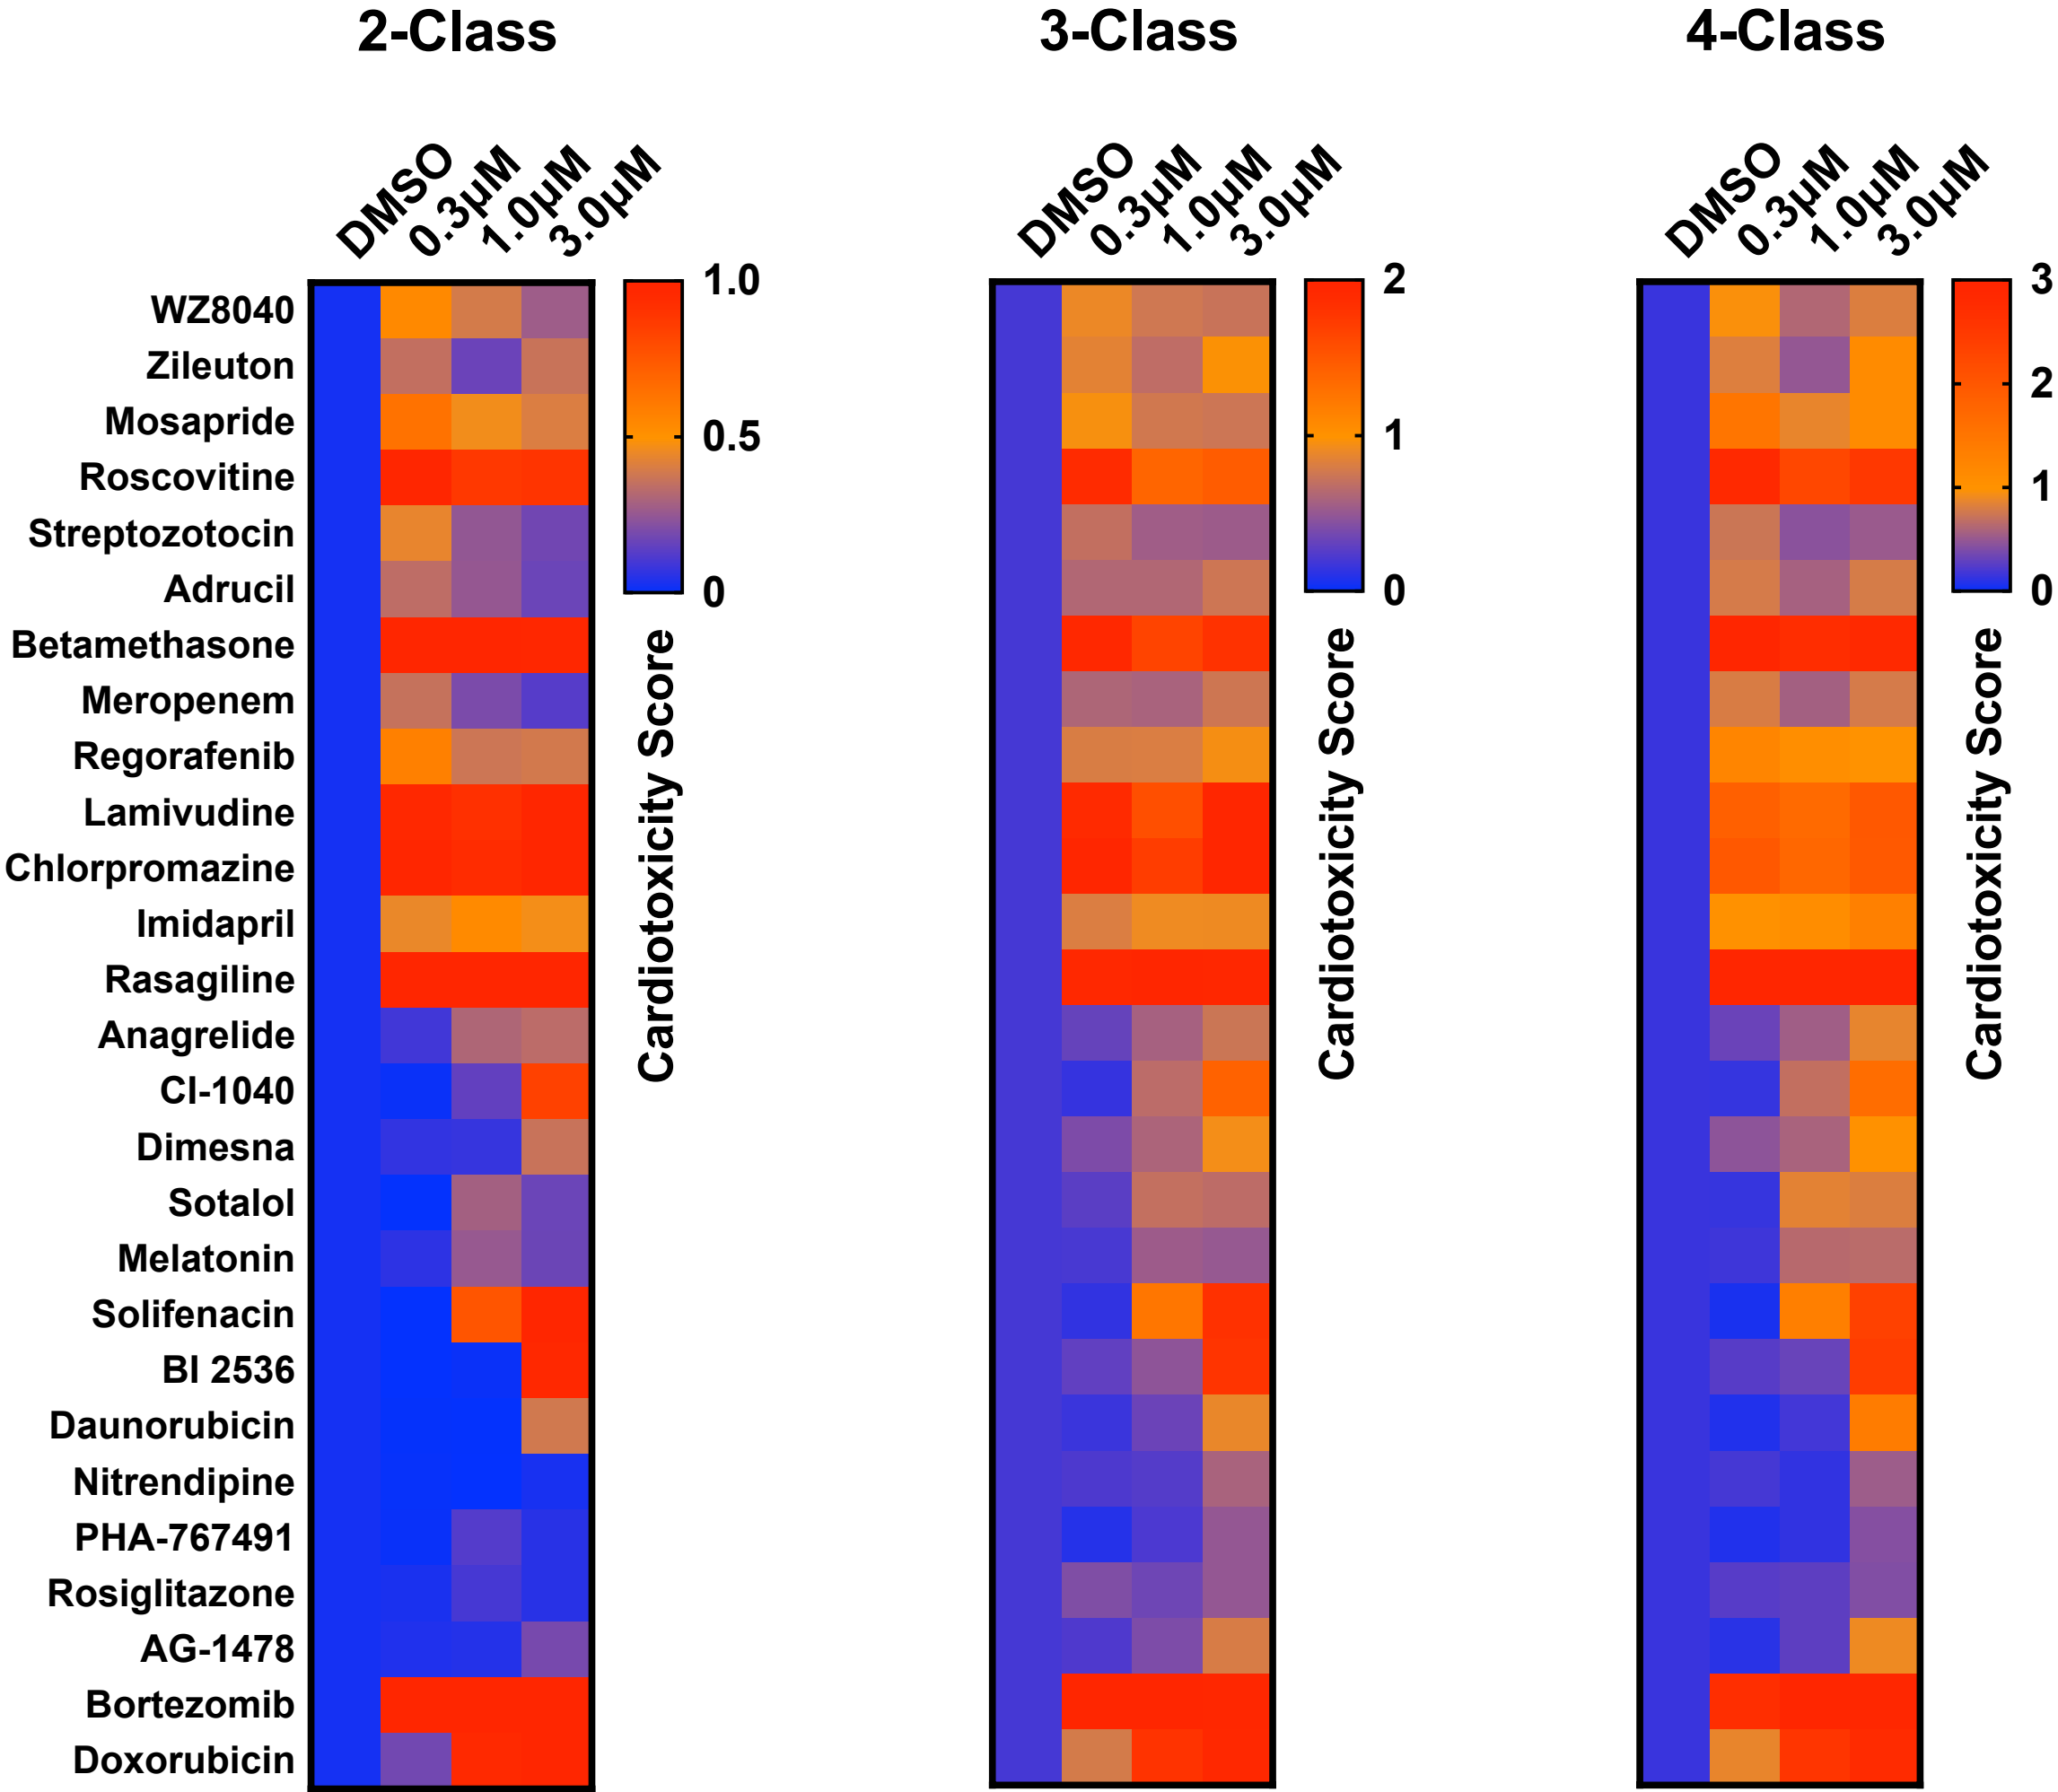

B

Immunostaining Readout

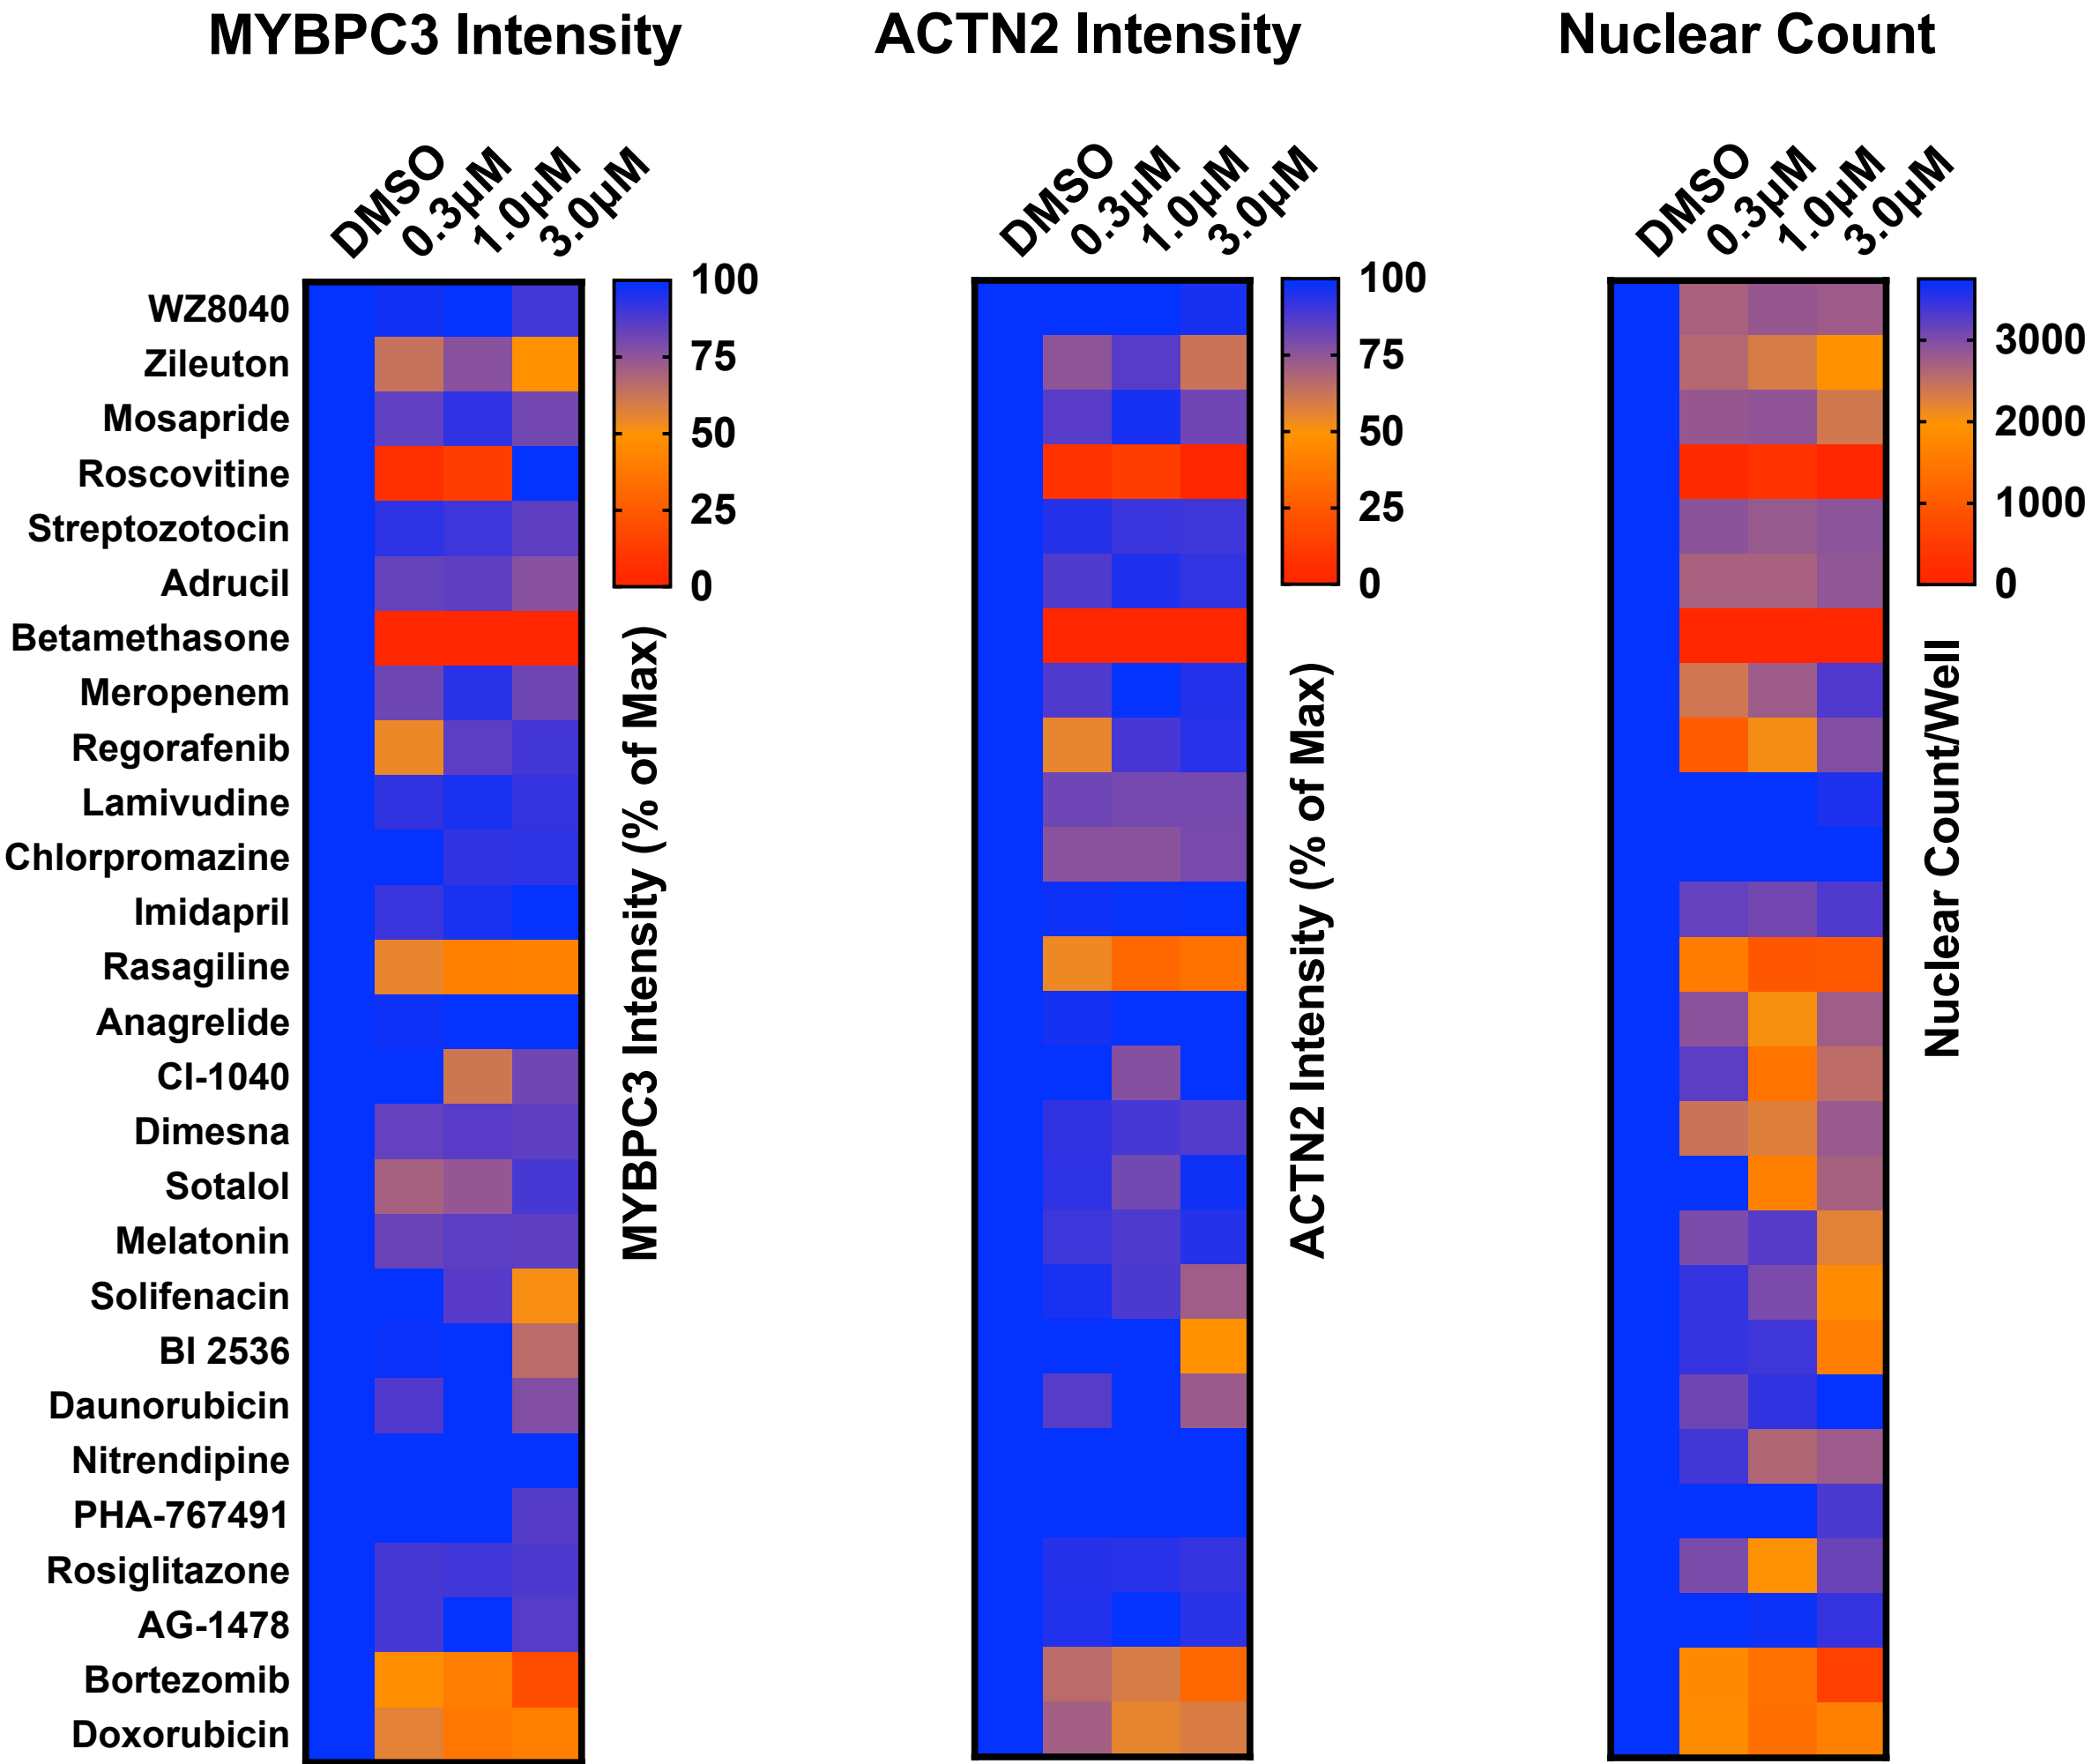

Supplement: supp [file elife-68714-supp-v1.zip]

**A**

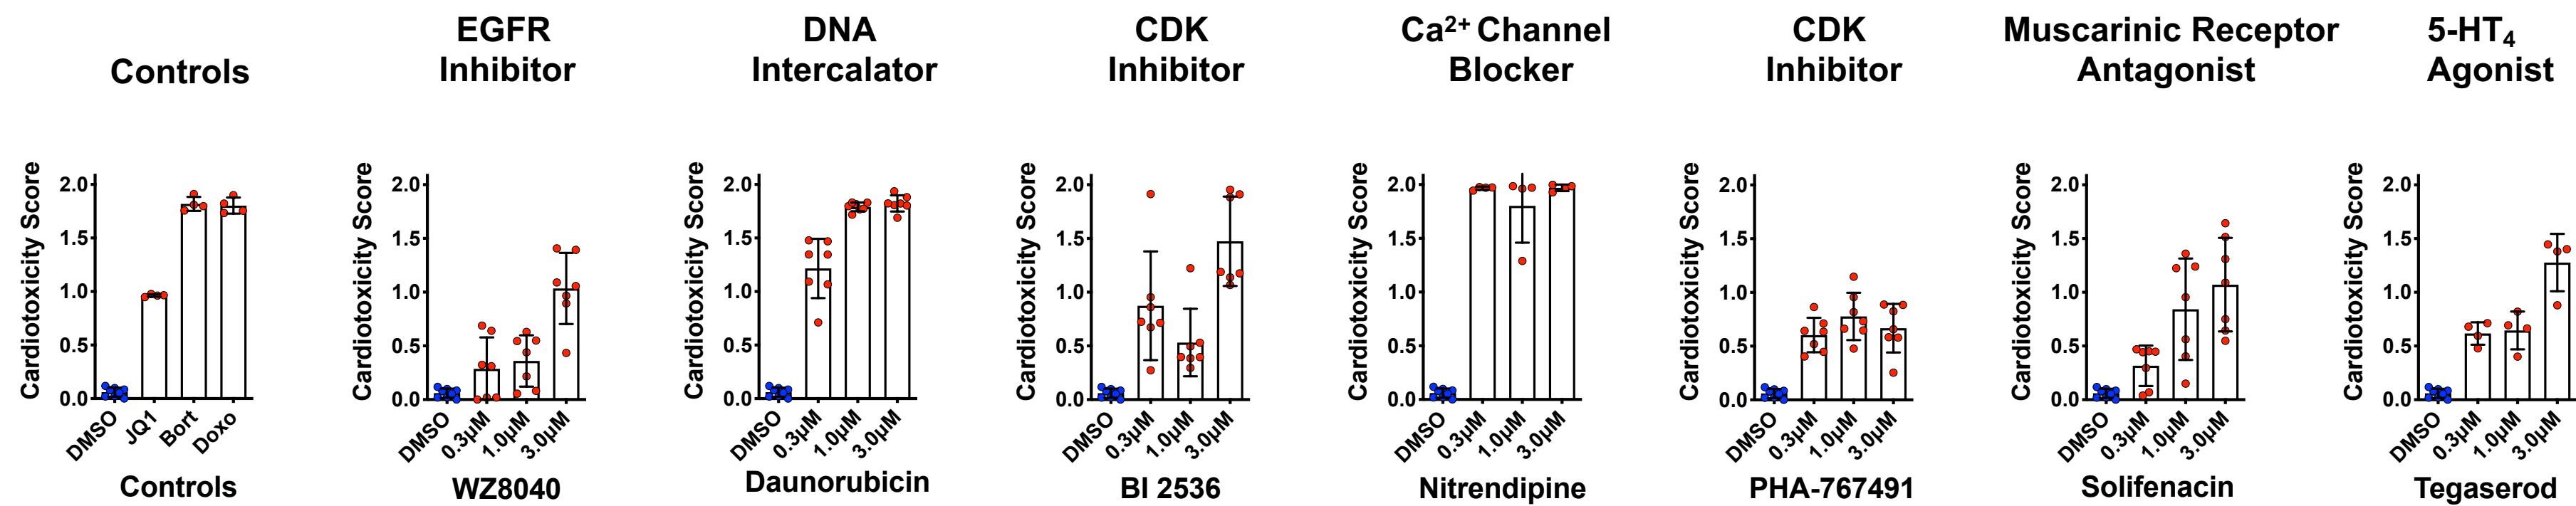

# B

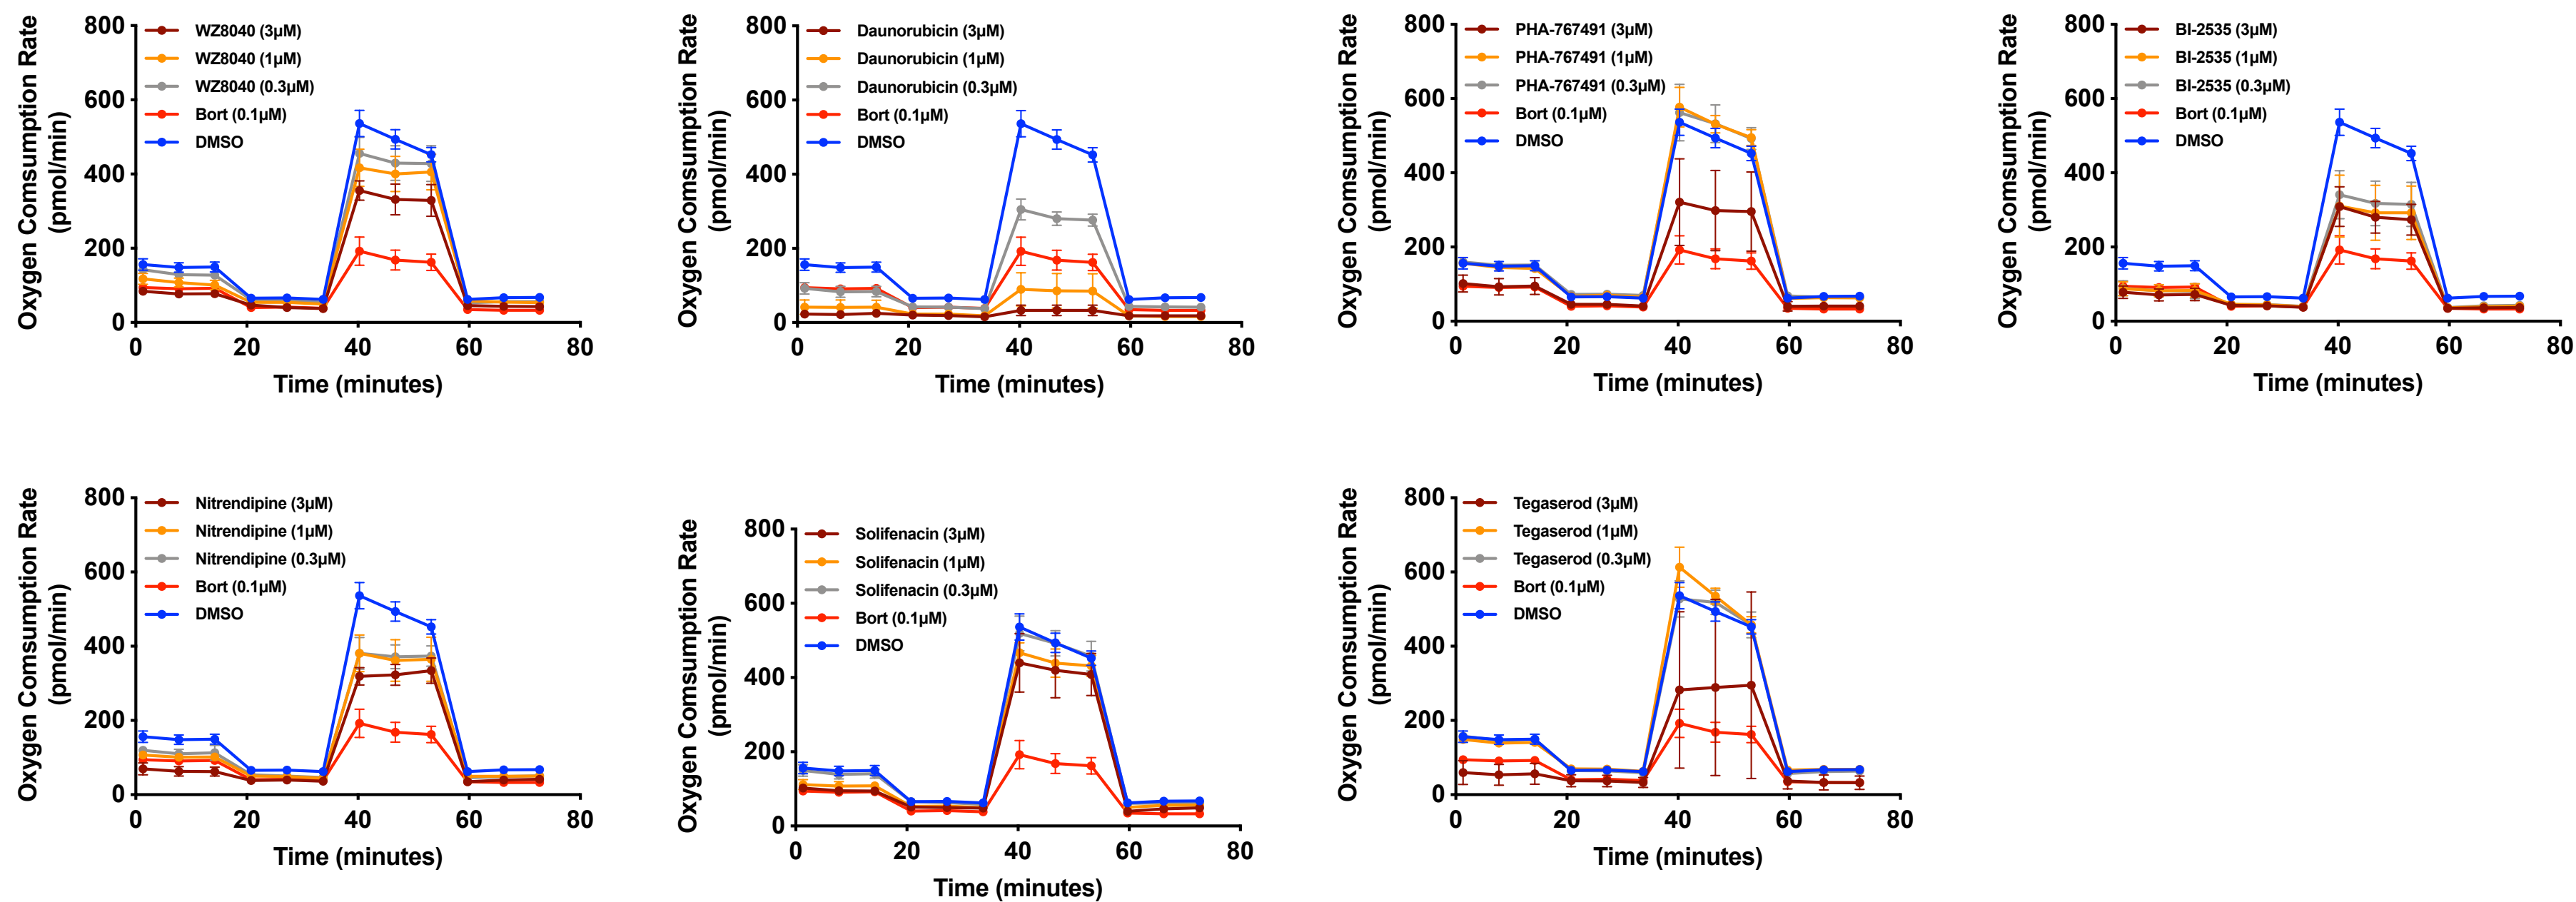

**C**

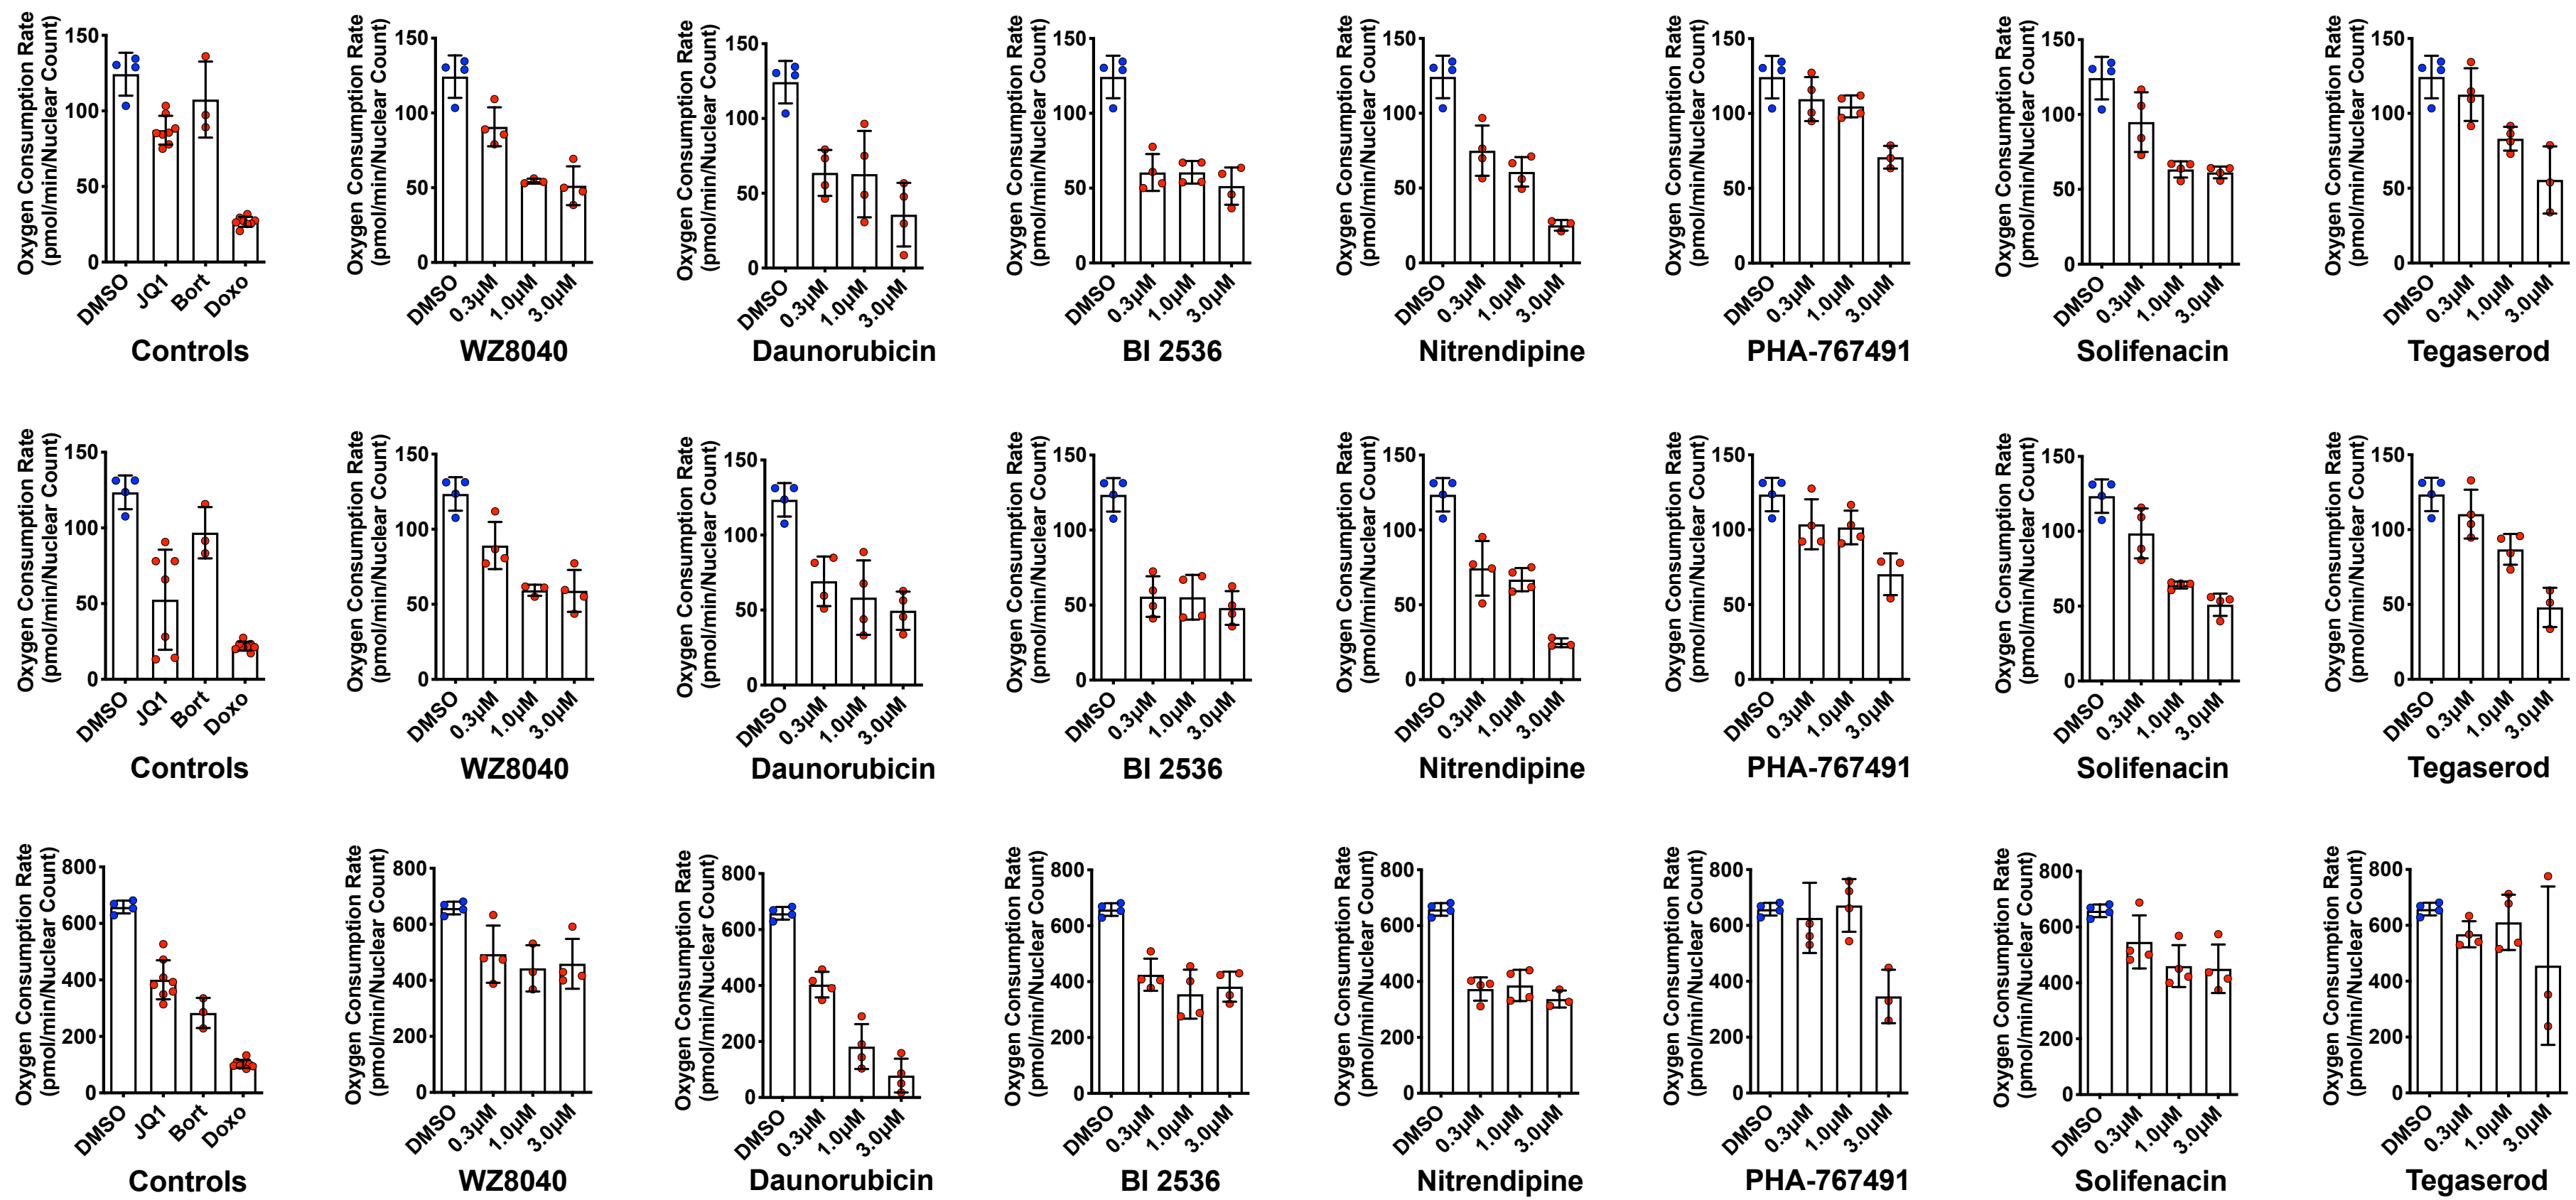

Supplement: supp [file elife-68714-supp-v1.zip]
